# Supplementary material for: Distress and resilience of healthcare professionals during the COVID-19 pandemic (DARVID): study protocol for a mixed-methods research project
Source: PubMed Central journal article supplement — BMJ Open. 2020 Jul 31;10(7):e039832. doi: 10.1136/bmjopen-2020-039832 (PMC7397979; doi:10.1136/bmjopen-2020-039832), 2020-07-31
Supplement: bmjopen-2020-039832.draft_revisions.pdf [file bmjopen-2020-039832.draft_revisions.pdf]

# BMJ Open

BMJ Open is committed to open peer review. As part of this commitment we make the peer review history of every article we publish publicly available.

When an article is published we post the peer reviewers' comments and the authors' responses online. We also post the versions of the paper that were used during peer review. These are the versions that the peer review comments apply to.

The versions of the paper that follow are the versions that were submitted during the peer review process. They are not the versions of record or the final published versions. They should not be cited or distributed as the published version of this manuscript.

BMJ Open is an open access journal and the full, final, typeset and author-corrected version of record of the manuscript is available on our site with no access controls, subscription charges or pay-per-view fees (<http://bmjopen.bmj.com>).

If you have any questions on BMJ Open's open peer review process please email [info.bmjopen@bmj.com](mailto:info.bmjopen@bmj.com)

# BMJ Open

## Distress and resilience of healthcare professionals during the COVID-19 pandemic (DARVID): study protocol for a mixed-methods research project

|                               |                                                                                                                                                                                                                                                                                                                                                                                                                                                                                                                                                                                                    |
|-------------------------------|----------------------------------------------------------------------------------------------------------------------------------------------------------------------------------------------------------------------------------------------------------------------------------------------------------------------------------------------------------------------------------------------------------------------------------------------------------------------------------------------------------------------------------------------------------------------------------------------------|
| Journal:                      | <i>BMJ Open</i>                                                                                                                                                                                                                                                                                                                                                                                                                                                                                                                                                                                    |
| Manuscript ID                 | bmjopen-2020-039832                                                                                                                                                                                                                                                                                                                                                                                                                                                                                                                                                                                |
| Article Type:                 | Protocol                                                                                                                                                                                                                                                                                                                                                                                                                                                                                                                                                                                           |
| Date Submitted by the Author: | 27-Apr-2020                                                                                                                                                                                                                                                                                                                                                                                                                                                                                                                                                                                        |
| Complete List of Authors:     | Fuchs, Alexander; Inselspital University Hospital Bern, Department of Anaesthesiology and Pain Medicine<br>Abegglen, Sandra; University of Bern, Department of Health Psychology and Behavioural Medicine<br>Berger-Estilita, Joana; Inselspital University Hospital Bern, Department of Anaesthesiology and Pain Medicine<br>Greif, Robert ; Inselspital University Hospital Bern, Department of Anaesthesiology and Pain Medicine; Sigmund Freud Private University Vienna, School of Medicine<br>Eigenmann, Helen; University of Bern, Department of Health Psychology and Behavioural Medicine |
| Keywords:                     | MENTAL HEALTH, Anxiety disorders < PSYCHIATRY, Depression & mood disorders < PSYCHIATRY, Public health < INFECTIOUS DISEASES, PRIMARY CARE, STATISTICS & RESEARCH METHODS                                                                                                                                                                                                                                                                                                                                                                                                                          |
|                               |                                                                                                                                                                                                                                                                                                                                                                                                                                                                                                                                                                                                    |

SCHOLARONE™  
Manuscripts

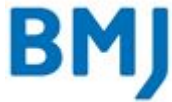

I, the Submitting Author has the right to grant and does grant on behalf of all authors of the Work (as defined in the below author licence), an exclusive licence and/or a non-exclusive licence for contributions from authors who are: i) UK Crown employees; ii) where BMJ has agreed a CC-BY licence shall apply, and/or iii) in accordance with the terms applicable for US Federal Government officers or employees acting as part of their official duties; on a worldwide, perpetual, irrevocable, royalty-free basis to BMJ Publishing Group Ltd ("BMJ") its licensees and where the relevant Journal is co-owned by BMJ to the co-owners of the Journal, to publish the Work in this journal and any other BMJ products and to exploit all rights, as set out in our [licence](#).

The Submitting Author accepts and understands that any supply made under these terms is made by BMJ to the Submitting Author unless you are acting as an employee on behalf of your employer or a postgraduate student of an affiliated institution which is paying any applicable article publishing charge ("APC") for Open Access articles. Where the Submitting Author wishes to make the Work available on an Open Access basis (and intends to pay the relevant APC), the terms of reuse of such Open Access shall be governed by a Creative Commons licence – details of these licences and which [Creative Commons](#) licence will apply to this Work are set out in our licence referred to above.

Other than as permitted in any relevant BMJ Author's Self Archiving Policies, I confirm this Work has not been accepted for publication elsewhere, is not being considered for publication elsewhere and does not duplicate material already published. I confirm all authors consent to publication of this Work and authorise the granting of this licence.

1  
2  
3 1 Title Page

4  
5 2 **Scientific title:**

6  
7 3 **Distress and resilience of healthcare professionals during the COVID-19 pandemic (DARVID):**  
8  
9 4 **study protocol for a mixed-methods research project**

10  
11 5  
12 6 **Acronym:** DARVID: **D**istress and **R**esilience of Healthcare Professionals during the COVID-19  
13  
14 7 Pandemic

15  
16 8  
17 9 **Authors:** Alexander Fuchs<sup>1\*</sup>, Sandra Abegglen<sup>2</sup>, Joana Berger-Estilita<sup>1</sup>, Robert Greif<sup>1,3</sup>, Helen  
18  
19 10 Eigenmann<sup>2</sup>

20  
21 11  
22 12 <sup>1</sup> Department of Anaesthesiology and Pain Medicine, Inselspital, Bern University Hospital, University  
23  
24 13 of Bern, Bern, Switzerland

25  
26 14 <sup>2</sup> Department of Health Psychology and Behavioural Medicine, Institute of Psychology, University of  
27  
28 15 Bern, Bern, Switzerland

29  
30 16 <sup>3</sup> School of Medicine, Sigmund Freud University Vienna, Vienna, Austria

31  
32 17 \*Corresponding author: Alexander Fuchs, Department of Anaesthesia and Pain Medicine, Bern  
33  
34 18 University Hospital and University of Bern, Freiburgstrasse 10, 3010 Bern, Switzerland, Tel: +41 (0)  
35  
36 19 31 632 24 83, Email: [alexander.fuchs@insel.ch](mailto:alexander.fuchs@insel.ch)

37  
38 20  
39 21 Word count, Abstract: 264/300

40  
41 22  
42 23 Word count text: 2833/4000

43  
44 24  
45  
46  
47  
48  
49  
50  
51  
52  
53  
54  
55  
56  
57  
58  
59  
60

1  
2  
3 **25 Abstract**  
4  
5 **26**

7 **27 Introduction** The unprecedented COVID-19 pandemic has exposed healthcare professionals to  
8  
9 **28** exceptional situations that can lead to increased anxiety (i.e., infection anxiety, perceived  
10  
11 **29** vulnerability), traumatic stress and depression. We will investigate the development of these  
12  
13 **30** psychological disturbances in healthcare professionals at the treatment front line and second line  
14  
15 **31** during the COVID-19 pandemic over a 12-month period in different countries. Additionally, we will  
16  
17 **32** explore whether personal resilience factors and a work-related sense of coherence influence the  
18  
19 **33** development of mental health problems of healthcare professionals.

20 **34 Methods and analysis** We plan to carry out a sequential qualitative–quantitative mixed-methods-  
21  
22 **35** design study. The quantitative phase consists of a longitudinal online survey based on six validated  
23  
24 **36** questionnaires, to be completed at three points in time. A qualitative analysis will follow at the end of  
25  
26 **37** the pandemic, to comprise at least nine semi-structured interviews. The *a-priori* sample size for the  
27  
28 **38** survey will be a minimum of 160 participants, which we will extend to 400, to compensate for drop-  
29  
30 **39** out. Recruitment into the study will be through personal invitations and the ‘snowballing’ sampling  
31  
32 **40** technique. Hierarchical linear regression combined with qualitative data analysis will facilitate greater  
33  
34 **41** understanding of any associations between resilience and mental health issues in healthcare  
35  
36 **42** professionals during pandemics.

37 **43 Ethics and dissemination** The study participants will provide their electronic informed consent. All  
38  
39 **44** recorded data will be stored on a secured research server at the study site, which will only be  
40  
41 **45** accessible to the investigators. The Bern Cantonal Ethics Committee has waived the need for ethical  
42  
43 **46** approval (Req-2020-00355; 1 April, 2020). There are no ethical, legal or security issues regarding the  
44  
45 **47** data collection, processing, storage and dissemination in this project.

46  
47 **48** Trial registration: ISRCTN13694948 (date of registration: 1 April, 2020)  
48  
49 **49**  
50  
51 **50**

52  
53 **51 Keywords:** COVID-19, healthcare professionals, anxiety, resilience, distress, work-related sense of  
54  
55 **52** coherence, mental health, depression, trauma, front-liners; perceived vulnerability to disease  
56  
57 **53**

## 54 **Strengths and limitations of this study**

- 55 • The mixed-methods design with quantitative and qualitative phases that include several validated  
56 instruments and the matched follow-up and semi-structured interviews will provide substantial  
57 insight in the state and development of psychological health and the thoughts of healthcare  
58 professionals during infectious pandemics in several countries;
- 59 • The sophisticated statistical analysis will include a clustered hierarchical data structure and any  
60 imbalanced data, by allowing residual components at each level in the hierarchy;
- 61 • Interdisciplinary and interprofessional cooperation between physicians and health psychologists  
62 will combine different research approaches, and will therefore yield more holistic data by bridging  
63 disciplinary gaps;
- 64 • The participating healthcare professionals will consent electronically and disclose their e-mails, but  
65 might not be representative of the entire population and for all countries;
- 66 • The survey will be accessible only in English, which might influence compliance of non-English  
67 native speakers.

68

## 69 Introduction

70

71 In December 2019, a new Coronavirus known as severe acute respiratory syndrome Coronavirus 2  
72 (SARS CoV-2) appeared for the first time in Wuhan (China). SARS CoV-2 causes severe hypoxaemic  
73 pneumonia, called Corona virus disease (COVID-19). Despite containment measures, the virus  
74 spread exponentially. The first case outside China was reported on the 13 January, 2020, in Thailand,  
75 which was connected to travel to Wuhan.<sup>1</sup> On 11 March, 2020, the World Health Organisation defined  
76 the COVID-19 outbreak as a pandemic.<sup>2</sup> In Europe, an Italian cluster developed exponentially, with  
77 the first deaths reported on 23 February, 2020.<sup>3</sup> It was soon clear that the health system in northern  
78 Italy could not cope with the large numbers of new patients with respiratory failure who required  
79 invasive ventilation support.<sup>4</sup> The COVID-19 pandemic put healthcare professionals (HCPs) in an  
80 unprecedented situation. The long working hours, the need for 'hard triage'<sup>5 6</sup> for ventilation support,  
81 and the tight restrictions on daily life implemented by the government had serious effects on both  
82 healthcare workers and the general population.<sup>7</sup>

83 Infectious diseases arise frequently, and nearly every year. However, these seldom challenge  
84 healthcare systems (e.g., limited capacity of hospital beds, understaffing of personnel) in the way  
85 seen for the COVID-19 pandemic. Therefore, data on the impact of such pandemics on HCPs are still  
86 not available.

87 A recent study from China showed a high prevalence of mental-health symptoms among all  
88 HCPs, including depression, insomnia, anxiety or trauma-stress disorder<sup>8</sup>, similar to those  
89 experienced by military personnel after participation in war scenarios.<sup>9</sup> Front-line HCPs who are  
90 involved in diagnosis, treatment and care of COVID-19 patients<sup>8</sup> are at particular risk of developing  
91 psychological distress and other mental-health symptoms.<sup>8 10</sup> HCPs are expected to be under the  
92 highest perceived threat of COVID-19, and if they believe that their infection with COVID-19 is likely  
93 (i.e., perceived vulnerability), this might have serious consequences on their own health. Additionally,  
94 concerns about the spread of the virus to their family members or friends, their need for self-isolation,  
95 their feelings of not having enough support, and their exposure to the catastrophic news in the media  
96 are believed to have a role in the development of such symptoms.<sup>8-11</sup> These negative stress outcomes  
97 can impact not only on the wellbeing of HCPs, but also on their ability to care effectively for others.<sup>12 13</sup>

1  
2  
3 98 At the other end of the spectrum, people who have to endure significant challenges might  
4  
5 99 experience a degree of post-traumatic growth<sup>14</sup>, which is a term used to describe the strengthening of  
6  
7 100 psychological resilience and values after exposure to particularly demanding situations.<sup>15</sup> Although  
8  
9 101 there is as yet no universal definition, psychological resilience is generally considered to be  
10  
11 102 multidimensional, and to consist of behaviours, thoughts and actions. In short, resilience refers to  
12  
13 103 positive adaptation despite adversity.<sup>16 17</sup> Adopting resilience-enhancing strategies might therefore  
14  
15 104 improve the day-to-day performance of HCPs at work.<sup>18</sup>

16 105 Personal resilience is also related to a sense of ‘coherence’.<sup>18 19</sup> A sense of coherence is  
17  
18 106 defined as a disposition to perceive life circumstances as manageable, comprehensible and  
19  
20 107 meaningful. This might influence a person’s resilience, by making them more adaptable in dealing  
21  
22 108 with distress and adverse events.<sup>18-21</sup> People with a strong sense of coherence are less prone to  
23  
24 109 *burn-out*, and are generally healthier.<sup>13 22-25</sup>

26 110 Due to the increasing prevalence of emerging infectious diseases (e.g., SARS CoV-1, Middle  
27  
28 111 East respiratory syndrome [MERS] CoV) and other worldwide catastrophic events, the capacity to  
29  
30 112 adapt is important, as it allows HCPs to act effectively and to stay healthy in potentially life-  
31  
32 113 threatening situations.<sup>18</sup> More information about associations between resilience factors and a work-  
33  
34 114 related sense of coherence of HCPs in such situations will help to counsel and support HCPs who are  
35  
36 115 facing the consequences of ‘COVID-19 anxiety’, perceived vulnerability, hopelessness, depression  
37  
38 116 and traumatic-stress symptoms.

39 117 This project is designed to primarily determine the degree of COVID-19 anxiety, perceived  
40  
41 118 vulnerability, depression and traumatic-stress symptoms and their variation in HCPs for specific time  
42  
43 119 periods and regions around the world. Additionally, the aim is to explore differences in COVID-19  
44  
45 120 anxiety, perceived vulnerability, depression and traumatic-stress symptoms between front-line (HCPs  
46  
47 121 directly treating COVID-19 patients) and second-line (HCPs not involved in direct care of COVID-19  
48  
49 122 patients) HCPs. A third aim is to determine whether there are any associations between these factors  
50  
51 123 and individual resilience and a work-related sense of coherence across the different phases of the  
52  
53 124 COVID-19 pandemic.

54  
55 125 Therefore, the research questions of this study are:

- 56  
57 126 • Do COVID-19 anxiety and perceived vulnerability differ over time between different countries?  
58  
59  
60



- 1  
2  
3 127 • Do COVID-19 anxiety and perceived vulnerability differ over time between first-line and second-  
4  
5 128 line HCPs?  
6  
7 129 • How do individual resilience and a work-related sense of coherence influence the development  
8  
9 130 of COVID-19 anxiety, perceived vulnerability, depression and traumatic-stress symptoms  
10  
11 131 during the different phases of a pandemic outbreak?  
12  
13 132 • How do individual resilience and a work-related sense of coherence influence the development  
14  
15 133 of COVID-19 anxiety, perceived vulnerability, depression and traumatic-stress symptoms of  
16  
17 134 front-line HCPs?  
18  
19 135 • What factors contribute to or alleviate COVID-19 anxiety and perceived vulnerability over the  
20  
21 136 study period for first-line HCPs?  
22  
23 137 • Which components of individual resilience and a work-related sense of coherence influence the  
24  
25 138 development of COVID-19 anxiety, perceived vulnerability, depression and traumatic-stress  
26  
27 139 symptoms during the study phases for front-line HCPs?  
28  
29 140

30 141 **Methods and analysis**

31  
32 142

33  
34 143 ***Study design overview***

35  
36 144 We will conduct a mixed-methods study, which will consist of two phases. The first quantitative phase  
37  
38 145 will explore the association of individual resilience, a work-related sense of coherence and the  
39  
40 146 development of mental-health symptoms during the COVID-19 pandemic, and their variations over  
41  
42 147 time, between countries and between front-line and second-line HCPs. The second qualitative phase  
43  
44 148 will consist of semi-structured interviews, and will explore the development of anxiety, perceived risk,  
45  
46 149 use of coping strategies, and personal resilience factors during the COVID-19 pandemic in front-line  
47  
48 150 HCPs. The combination of these two methodological approaches will allow triangulation and provide a  
49  
50 151 more granular understanding of the processes involved in any associations with anxiety, perceived  
51  
52 152 vulnerability, depression, traumatic-stress symptoms and resilience factors over the course of the  
53  
54 153 current COVID-19 pandemic.  
55  
56 154

1  
2  
3 155 ***Quantitative phase: longitudinal online survey***  
4

5 156

6  
7 157 ***Data collection***

8  
9 158 An online survey was launched on the 2 April, 2020, in English. This will collect data for 2 weeks. The  
10  
11 159 follow-ups are planned for June and October 2020, over another 2-week period. Depending on the  
12  
13 160 results of the follow-ups, a third might be added in late 2020.

14  
15 161 The longitudinal internet-based survey is a 64-item questionnaire (Supplemental Digital  
16  
17 162 Content 1) based on six pre-existing validated self-reporting questionnaires and demographic data.  
18  
19 163 This questionnaire is hosted online at Qualtrics (Provo, Utah, USA), which restricts access to one  
20  
21 164 response per device.

22  
23 165 The survey link will be primarily distributed through social media (LinkedIn, Facebook, Twitter,  
24  
25 166 WhatsApp, Threema), using the 'snowballing' sampling technique.<sup>26-28</sup> Later, personal contacts via e-  
26  
27 167 mail invitations from all of the authors will invite further study participants, with supporting  
28  
29 168 (inter)national societies e-mailing the link via their own mailing lists, to better distribute the survey.  
30  
31 169 Contact persons are asked to further distribute the survey, to promote the greatest number of  
32  
33 170 responses as possible over the entire study period.

34 171

35  
36 172 ***Participant inclusion and exclusion criteria***

37  
38 173 We will include HCPs over 18 years of age who agree to participate. All participants who do not  
39  
40 174 comply with these criteria will be excluded.

41 175

42  
43 176 ***Measurements***

44  
45 177 The primary outcome of this study is the variation in COVID-19 anxiety (adapted from the Swine Flu  
46  
47 178 Anxiety Items [SFI])<sup>29</sup> in different regions of Europe, over three time periods, measured using a  
48  
49 179 modified version of the SFI, <sup>29</sup> a 10-item survey developed for the H1N1 (swine flu) epidemic for  
50  
51 180 anxiety disorders and somatization.

52  
53 181 The secondary outcomes will include:

- 54  
55 182 • the Perceived Vulnerability to Disease (PVD) questionnaire score,<sup>30</sup> a 15-item tool used to  
56  
57 183 measure subjective vulnerability to disease;

- 1  
2  
3 184 • the Patient Health Questionnaire (PHQ-9) score,<sup>31</sup> a 9-item tool developed for depression  
4  
5 185 evaluation;  
6  
7 186 • the Impact of Event Scale-6 (IES-6) score,<sup>32</sup> a 6-items tool for evaluation of symptoms of post-  
8  
9 187 traumatic stress reactions;  
10  
11 188 • the Connor-Davidson Resilience Scale (CD-RISC 10) score,<sup>33</sup> a 10-item tool, as a short version  
12  
13 189 of the CD-RISC 25,<sup>34</sup> to evaluate individual resilience;  
14  
15 190 • the Work-Sense of Coherence Scale (Work-SoC) score,<sup>35</sup> a 9-item tool to evaluate the  
16  
17 191 perceived comprehensibility, manageability and meaningfulness of an individual's current work  
18  
19 192 situation;  
20  
21 193 • a globally measured current risk perception for becoming infected while working, as assessed  
22  
23 194 by a self-created item "I am afraid I will become infected with COVID-19 while carrying out my  
24  
25 195 usual work practices" (measured on a visual analogue scale from 0-10);  
26  
27 196 • a globally measured current perception of the stress at work, as a second self-created item  
28  
29 197 "How stressful is your current work situation for you?" (measured on a visual analogue scale  
30  
31 198 from 0-10);  
32  
33 199 • socio-demographic variables, and work-related and COVID-19-related characteristics: country  
34  
35 200 and city of current occupation, age, sex, profession, main working place, years working in the  
36  
37 201 healthcare system, belonging to a risk population, sharing a household with other people, being  
38  
39 202 in a relationship, having children, being pregnant or living with a pregnant woman, private close  
40  
41 203 contact with people belonging to the risk population, having had direct contact with COVID-19-  
42  
43 204 infected patients, being infected with COVID-19, having been positively tested for COVID-19  
44  
45 205 antibodies.

46 206

#### 47 207 *Sample size calculation*

48  
49 208 The required sample size was calculated using an *a-priori* power analysis with G\*Power 3.1.<sup>36</sup>

50  
51 209 Assuming a small effect size ( $f^2 = .15$ ) for a repeated measure ANOVA with three time points and  
52  
53 210 within-between interaction ( $\alpha = .05$ ,  $1-\beta = .95$ ), the minimum required sample size for four language  
54  
55 211 groups was  $n = 160$ . To compensate for drop-out over the three measurement times, we will aim for  
56  
57 212 400 responders.

58  
59 213  
60

1  
2  
3 214 *Statistical analysis plan*

4  
5 215 To accommodate between- and within-effects in light of possibly unequal numbers of observations,  
6  
7 216 linear mixed models will be fit to the longitudinal measures of the primary and secondary outcome  
8  
9 217 variables.<sup>37</sup> The analyses will be conducted using the R-package: nlme<sup>38</sup> in R Statistical Language,<sup>39</sup>  
10  
11 218 using full maximum likelihood estimations. The normal distributions of the outcome variables will be  
12  
13 219 examined by residual diagnostics of the fitted multilevel models.

14  
15 220 For each primary and secondary outcome variable, the analysis will proceed according to  
16  
17 221 different steps<sup>37</sup>. First, a null model (intercept only model) will be estimated, which allows an  
18  
19 222 estimation of the proportion of variation in the outcome variables; i.e., between and within the persons  
20  
21 223 in the sample. The first model (unconditional growth model with random intercept) will examine the  
22  
23 224 within-persons trajectories of change across measurement points. The second model (conditional  
24  
25 225 growth model with random intercept and cross-level interaction) will examine the effects of country/  
26  
27 226 front-line and second-line HCPs across the different times (i.e., the pandemic phase).

28 227 To address the research questions that are focussed on the relationships between the  
29  
30 228 different outcome variables and the resilience and work-related sense of coherence, structural  
31  
32 229 equation modelling will be performed<sup>40</sup>. These analyses will be carried out using the R-package:  
33  
34 230 lavaan<sup>41</sup> in the R Statistical Language,<sup>39</sup> using full maximum likelihood estimation.

35  
36 231

37 232 ***Qualitative phase: semi-structured interviews***

38  
39 233

40  
41 234 *Data collection*

42  
43 235 After completion of the online survey, the participants will be invited to participate in the semi-  
44  
45 236 structured interviews. We will select all of the participants for the qualitative phase according to  
46  
47 237 availability and region. We will select them from the pool used in the quantitative phase, so as to best  
48  
49 238 represent their experience and views.

50  
51 239 Purposive sampling into homogenous groups will be performed, according to participant  
52  
53 240 location and availability, with the aim being to perform at least nine semi-structured interview groups.  
54  
55 241 All interviews will be coded in a phased fashion, with interim analysis to check for saturation (i.e.,  
56  
57 242 when additional data do not lead to any new themes). If saturation is not reached, three more  
58  
59 243 interviews will be performed. Sixty-minute semi-structured interviews will be conducted after the  
60

1  
2  
3 244 quantitative phase is finished, in different locations in Europe. The aim is to explore participants' views  
4  
5 245 on the influence of resilience and a work-related sense of coherence on the development of anxiety,  
6  
7 246 depression and trauma-stress disorder during the pandemic outbreak. A semi-structured interview  
8  
9 247 guide has been developed to conduct the session (Supplemental Digital Content 2). These data will  
10  
11 248 consist of the audio and video recordings, which will be further transcribed by two members of the  
12  
13 249 study team.

14 250

16 251 *Analysis plan*

18 252 All of the data will be processed with the software MaxQDA2020 (Verbi, Berlin, Germany). Data  
19  
20 253 originating from the semi-structured interviews will be processed according to the Miles and  
21  
22 254 Huberman<sup>42</sup> framework for data analysis. This initially includes data reduction – including segmenting,  
23  
24 255 editing and summarising the data – followed by data display, and finally conclusions verification. Two  
25  
26 256 investigators will code the first group interviews independently and will agree on the coding scheme  
27  
28 257 for the remaining interviews. Respondent validation and paired coding will be performed as a way to  
29  
30 258 increase quality. Memoing will be performed parallel to coding.

31 259

33 260 *Trial status*

35 261 The trial started to recruit participants for the first round of the survey (quantitative data) on 2 April,  
36  
37 262 2020, for a period of 2 weeks. The next rounds are planned for July and October 2020. After the  
38  
39 263 quantitative data collection ends, we will move on to the qualitative phase.

40 264

42 265 *Ethics*

43  
44  
45 266 The Bern Cantonal Ethics Committee waived the need for ethical approval on 1 April, 2020, according  
46  
47 267 to the Swiss Act for Human Research (BASEC Nr. 2020-00355, Prof. Dr. med Christian Seiler,  
48  
49 268 Murtenstrasse 31, 3010 Bern, Switzerland, Tel: +41-31-6337070, [info.kek.kapa@gef.be.ch](mailto:info.kek.kapa@gef.be.ch)). All  
50  
51 269 procedures for this investigation will follow the Helsinki Declaration. <sup>43</sup>

52  
53 270 All of the participants will be sent a link to the survey, with a detailed cover letter that explains  
54  
55 271 the entire project, the purpose of the project, the context of the research, and the contacts of the lead  
56  
57 272 investigator (available at [https://psyunibe.qualtrics.com/jfe/form/SV\\_3WYgbkLWqiDPDG5](https://psyunibe.qualtrics.com/jfe/form/SV_3WYgbkLWqiDPDG5)). Electronic  
58  
59 273 informed consent to participate will be obtained from all of the participants at the beginning of the

1  
2  
3 274 survey. Should any participants decide not to participate in the study, their decision will not affect  
4  
5 275 them in any way. No incentives will be offered or given. Participants will be asked for their e-mail, to  
6  
7 276 enable contact with them during the follow-up and qualitative phases of the study, and for pairing  
8  
9 277 purposes. During the interviews, participants' faces will not be included in the video recordings, and  
10  
11 278 their performances will not be shared with any external subjects.

12  
13 279 All of the researchers involved will comply with the Data Protection Act and the Swiss Law for  
14  
15 280 Human Research. There are no ethical, legal or security issues regarding the data collection,  
16  
17 281 processing, storage and dissemination for this project. We will neither obtain nor generate sensitive  
18  
19 282 data, and we do not sign any confidentiality agreement. All data will be stored for up to 10 years after  
20  
21 283 the project, according to the Swiss Law for Human Research.

22 284 This study has been registered at the UK based International Standard Randomised  
23  
24 285 Controlled Trial Number (ISRCTN) under the registration number: ISRCTN13694948

25  
26 286

### 27 28 287 **Data storage and management**

29  
30 288 All relevant data generated or used by the research project (i.e., raw data, all processed data that  
31  
32 289 directly underlies the reported results, and all ancillary information necessary to understand, evaluate,  
33  
34 290 interpret and re-use the results of the study) will be stored on the official server of the Institute of  
35  
36 291 Psychology, Department of Health Psychology and Behavioural Medicine at the University of Bern. All  
37  
38 292 of the data are, and will be, password protected and only accessible by SA and HE. The datasets will  
39  
40 293 be flagged for long-term storage. Datasets flagged for long-term storage are subjected to specific  
41  
42 294 measures to preserve data integrity and data safety, such as additional back-ups, regular re-writes to  
43  
44 295 new storage media, and redundant storage in third-party repositories.

45 296 The datasets generated and analysed during the current study will be available from the  
46  
47 297 primary investigator upon reasonable request from university-based research groups with suitable  
48  
49 298 and answerable research questions. The primary investigator will be responsible for ensuring that  
50  
51 299 electronic file permissions are correctly assigned and for advising on other aspects of data storage  
52  
53 300 and security. Both qualitative and quantitative data are expected to be available from March 2021. We  
54  
55 301 expect no limitations with respect to publishing the data.

56  
57 302

### 58 59 303 **Publication and dissemination plan**

1  
2  
3 304 The study results will be published in a peer-reviewed international medical journal after the first  
4  
5 305 trimester of 2021. A full timeline of the project is shown in Figure 1.  
6

7 306

8  
9 307 ***Public involvement statement***

10 308 This research will be carried out without patient involvement, as patients are not the study subjects.

11 309 We have involved the Swiss Association of Assistants and Registrars (VSAO) and the Swiss Society

12 310 of Anaesthesiology and Reanimation (SGAR) to comment on the study design, and have consulted

13 311 HCPs on relevant outcomes. After the data analysis, we will invite them to interpret the results again.

14 312 We have not had time to invite persons outside the study group to contribute to the writing or editing

15 313 of this document, because of the velocity of the progression of the COVID-19 pandemic.  
16

17 314

18 315 ***Importance of the study***

19 316 Despite the large body of literature that is focussed on the prevalence of mental health symptoms

20 317 after catastrophes or natural disasters, the investigation of the resilience of HCPs is scarce,

21 318 particularly in the face of a surge capacity. In disaster situations, the prevalence of resilience appears

22 319 to depend on adequate preparedness, good social support and proactive coping styles<sup>9</sup>. However,

23 320 most disaster sites do not impose social distancing and self-isolation procedures, which might further

24 321 compromise the HCP ability to cope. It has been shown before that professionals involved in disaster

25 322 relief work can develop post-traumatic growth<sup>14 15</sup>. Establishing a clear relationship between resilience

26 323 and a work-related sense of coherence with the development of mental symptoms during exceptional

27 324 situations like the current COVID-19 pandemic might help to identify HCPs who are both particularly

28 325 protected and at risk, which will allow the adequate distribution of psychological interventions.

29 326 Organisations can also potentiate resilience in their employees by ensuring that they are adequately

30 327 trained. This is would be an affordable measure that can save money and resources by keeping the

31 328 staff at work and avoiding sick leave.  
32

33 329  
34  
35  
36  
37  
38  
39  
40  
41  
42  
43  
44  
45  
46  
47  
48  
49  
50  
51  
52  
53  
54  
55  
56  
57  
58  
59  
60

1  
2  
3 **330 References**  
4

5 331

6  
7 332 1. World Health Organisation. Novel Coronavirus (2019-nCoV) - Situation Report 1; 12 January, 2020.

8  
9 333 2. World Health Organisation. Coronavirus disease 2019 (COVID-19) - Situation Report 51; 11 March,  
10 334 2020.

11  
12 335 3. World Health Organisation. Novel Coronavirus (2019-nCoV) - Situation Report 34; 23 February,  
13 336 2020.

14  
15 337 4. Remuzzi A, Remuzzi G. COVID-19 and Italy: what next? *The Lancet* 2020 doi: 10.1016/S0140-  
16 338 6736(20)30627-9 [published online first: 18 March, 2020]

17  
18 339 5. Italian Society of Anesthesia, Analgesia, Resuscitation and Intensive Care (*Società Italiana di*  
19 340 *Anestesia Analgesia Rianimazione e Terapia Intensiva* [SIAARTI]). Clinical ethics  
20 341 recommendations for the allocation of intensive care treatment, in exceptional, resource-  
21 342 limited circumstances [www.siaarti.it](http://www.siaarti.it): Italian Society of Anesthesia, Analgesia, Resuscitation  
22 343 and Intensive Care (Società Italiana di Anestesia Analgesia Rianimazione e Terapia Intensiva  
23 344 [SIAARTI]); 2020 [updated 16 March, 2020. Available from:

24 345 [http://www.siaarti.it/SiteAssets/News/COVID19%20-](http://www.siaarti.it/SiteAssets/News/COVID19%20-%20documenti%20SIAARTI/SIAARTI%20-%20Covd-19%20-%20Clinical%20Ethics%20Reccomendations.pdf)  
25 346 [%20documenti%20SIAARTI/SIAARTI%20-%20Covd-19%20-](http://www.siaarti.it/SiteAssets/News/COVID19%20-%20documenti%20SIAARTI/SIAARTI%20-%20Covd-19%20-%20Clinical%20Ethics%20Reccomendations.pdf)  
26 347 [%20Clinical%20Ethics%20Reccomendations.pdf](http://www.siaarti.it/SiteAssets/News/COVID19%20-%20documenti%20SIAARTI/SIAARTI%20-%20Covd-19%20-%20Clinical%20Ethics%20Reccomendations.pdf) Last accessed: 2 April, 2020.

27  
28 348 6. Bouadma L, Lescure FX, Lucet JC, et al. Severe SARS-CoV-2 infections: practical considerations  
29 349 and management strategy for intensivists. *Intensive Care Med* 2020;46(4):579-82. doi:  
30 350 10.1007/s00134-020-05967-x [published online first: 28 February, 2020]

31  
32 351 7. Robertson E, Hershenfield K, Grace SL, et al. The psychosocial effects of being quarantined  
33 352 following exposure to SARS: a qualitative study of Toronto healthcare workers. *Can J*  
34 353 *Psychiat* 2004;49(6):403-7. doi: 10.1177/070674370404900612

35  
36 354 8. Lai J, Ma S, Wang Y, et al. Factors associated with mental-health outcomes among healthcare  
37 355 workers exposed to Coronavirus disease 2019. *JAMA Netw Open* 2020;3(3):e203976. doi:  
38 356 10.1001/jamanetworkopen.2020.3976 [published online first: 24 March, 2020]

39  
40 357 9. Kelly FE, Osborn M, Stacey MS. Improving resilience in anaesthesia and intensive care medicine -  
41 358 learning lessons from the military. *Anaesthesia* 2019 doi: 10.1111/anae.14911



- 1  
2  
3 359 10. Lee AM, Wong JG, McAlonan GM, et al. Stress and psychological distress among SARS survivors  
4  
5 360 1 year after the outbreak. *Can J Psychiatry* 2007;52(4):233-40. doi:  
6  
7 361 10.1177/070674370705200405  
8  
9 362 11. Wong TW, Yau JK, Chan CL, et al. The psychological impact of severe acute respiratory  
10  
11 363 syndrome outbreak on healthcare workers in Emergency Departments and how they cope.  
12  
13 364 *Eur J Emerg Med* 2005;12(1):13-8. doi: 10.1097/00063110-200502000-00005  
14  
15 365 12. Barnett JE, Baker EK, Elman NS, et al. In pursuit of wellness: the self-care imperative.  
16  
17 366 *Professional Psychology: Res Pract* 2007;38(6):603a.  
18  
19 367 13. Van der Colff JJ, Rothmann S. Occupational stress, sense of coherence, coping, burnout and  
20  
21 368 work engagement of registered nurses in South Africa. *SA J Indust Psychol* 2009;35(1):1-10.  
22  
23 369 14. Brooks S, Amlot R, Rubin GJ, et al. Psychological resilience and post-traumatic growth in  
24  
25 370 disaster-exposed organisations: overview of the literature. *BMJ Mil Health* 2020;166(1):52-56.  
26  
27 371 doi: 10.1136/jramc-2017-000876  
28  
29 372 15. Greenberg N, Docherty M, Gnanapragasam S, et al. Managing mental health challenges faced by  
30  
31 373 healthcare workers during COVID-19 pandemic. *Brit Med J* 2020;368:m1211. doi:  
32  
33 374 10.1136/bmj.m1211 [published online first: 29 March, 2020]  
34  
35 375 16. Luthar S. Resilience in development: a synthesis of research across five decades. In: Cicchetti D,  
36  
37 376 Cohen DJ, eds. *Developmental Psychopathology: Risk, Disorder, and Adaptation*. 2nd. ed.  
38  
39 377 New York: John Wiley & Sons Inc. 2006: 739–95.  
40  
41 378 17. Manyena SB. The concept of resilience revisited. *Disasters* 2006;30(4):434-50.  
42  
43 379 18. Streb M, Haller P, Michael T. PTSD in paramedics: resilience and sense of coherence. *Behav*  
44  
45 380 *Cogn Psychother* 2014;42(4):452-63. doi: 10.1017/S1352465813000337  
46  
47 381 19. Eriksson M, Lindstrom B. Antonovsky's sense of coherence scale and the relation with health: a  
48  
49 382 systematic review. *J Epidemiol Community Health* 2006;60(5):376-81. doi:  
50  
51 383 10.1136/jech.2005.041616  
52  
53 384 20. Antonovsky A. *Unraveling the mystery of health: how people manage stress and stay well:*  
54  
55 385 *Jossey-bass* 1987.  
56  
57 386 21. Antonovsky H, Sagy S. The development of a sense of coherence and its impact on responses to  
58  
59 387 stress situations. *J Social Psychol* 1986;126(2):213-26.  
60

- 1  
2  
3 388 22. Gilbar O. Relationship between burnout and sense of coherence in health social workers. *Soc*  
4  
5 389 *Work Health Care* 1998;26(3):39-49. doi: 10.1300/J010v26n03\_03  
6  
7 390 23. Levert T, Lucas M, Ortlepp K. Burnout in psychiatric nurses: contributions of the work environment  
8  
9 391 and a sense of coherence. *SA J Psychol* 2000;30(2):36-43.  
10  
11 392 24. Tselebis A, Moulou A, Ilias I. Burnout versus depression and sense of coherence: study of Greek  
12  
13 393 nursing staff. *Nurs Health Sci* 2001;3(2):69-71. doi: 10.1046/j.1442-2018.2001.00074.x  
14  
15 394 25. Pahkin K, Väänänen A, Koskinen A, et al. Organizational change and employees' mental health:  
16  
17 395 the protective role of sense of coherence. *J Occupat Environ Med* 2011;53(2):118-23.  
18  
19 396 26. Baltar F, Brunet I. Social research 2.0: virtual snowball sampling method using Facebook. *Internet*  
20  
21 397 *Research* 2012  
22  
23 398 27. Zdravkovic M, Berger-Estilita J, Sorbello M, et al. An international survey about rapid sequence  
24  
25 399 intubation of 10,003 anaesthetists and 16 airway experts. *Anaesthesia* 2020;75(3):313-22.  
26  
27 400 doi: 10.1111/anae.14867  
28  
29 401 28. Zdravkovic M, Osinova D, Brull SJ, et al. Perceptions of gender equity in departmental leadership,  
30  
31 402 research opportunities, and clinical work attitudes: an international survey of 11 781  
32  
33 403 anaesthesiologists. *Br J Anaesth* 2020;124(3):e160-e70. doi: 10.1016/j.bja.2019.12.022  
34  
35 404 [published online first: 2 February, 2020]  
36  
37 405 29. Wheaton MG, Abramowitz JS, Berman NC, et al. Psychological predictors of anxiety in response  
38  
39 406 to the H1N1 (swine flu) pandemic. *Cognitive Therap Res* 2012;36(3):210-18.  
40  
41 407 30. Duncan LA, Schaller M, Park JH. Perceived vulnerability to disease: development and validation  
42  
43 408 of a 15-item self-report instrument. *Personality Individ Differ* 2009;47(6):541-46.  
44  
45 409 31. Kroenke K, Spitzer RL, Williams JB. The PHQ-9: validity of a brief depression severity measure. *J*  
46  
47 410 *Gen Intern Med* 2001;16(9):606-13. doi: 10.1046/j.1525-1497.2001.016009606.x  
48  
49 411 32. Thoresen S, Tambs K, Hussain A, et al. Brief measure of posttraumatic stress reactions: impact of  
50  
51 412 Event Scale-6. *Soc Psychiatry Psychiatr Epidemiol* 2010;45(3):405-12. doi: 10.1007/s00127-  
52  
53 413 009-0073-x  
54  
55 414 33. Campbell-Sills L, Stein MB. Psychometric analysis and refinement of the Connor-Davidson  
56  
57 415 Resilience Scale (CD-RISC): validation of a 10-item measure of resilience. *J Trauma Stress*  
58  
59 416 2007;20(6):1019-28. doi: 10.1002/jts.20271  
60

- 1  
2  
3 417 34. Connor KM, Davidson JR. Development of a new resilience scale: the Connor-Davidson  
4  
5 418 Resilience Scale (CD-RISC). *Depress Anxiety* 2003;18(2):76-82. doi: 10.1002/da.10113  
6  
7 419 35. Vogt K, Jenny GJ, Bauer GF. Comprehensibility, manageability and meaningfulness at work:  
8  
9 420 construct validity of a scale measuring work-related sense of coherence. *SA J Indust Psychol*  
10  
11 421 2013;39(1):1-8.  
12  
13 422 36. Faul F, Erdfelder E, Lang AG, et al. G\*Power 3: a flexible statistical power analysis program for  
14  
15 423 the social, behavioral, and biomedical sciences. *Behav Res Meth* 2007;39(2):175-91. doi:  
16  
17 424 10.3758/bf03193146  
18  
19 425 37. Singer JD, Willett JB. *Applied Longitudinal Data Analysis: Modeling Change and Event*  
20  
21 426 *Occurrence*. Oxford, UK: Oxford University Press 2003.  
22  
23 427 38. Pinheiro J, Bates D, DebRoy S, et al. Linear and nonlinear mixed effects models. *R package*  
24  
25 428 *version* 2007;3:57.  
26  
27 429 39. Team RC. R: a language and environment for statistical computing Vienna, Austria2013 [Available  
28  
29 430 from: [www.R-project.org](http://www.R-project.org).  
30  
31 431 40. Kline RB. *Principles and Practice of Structural Equation Modeling*: Guilford Publications 2015.  
32  
33 432 41. Rosseel Y. Structural equation modeling with lavaan. *J Stat Softw* 2012;48:1-36.  
34  
35 433 42. Miles MB, Huberman AM, Saldaña J. *Qualitative Data Analysis: a Methods Sourcebook*. 3rd. ed:  
36  
37 434 *Thousand Oaks, CA: Sage* 2014  
38  
39 435 43. World Medical Association Declaration of Helsinki: ethical principles for medical research involving  
40  
41 436 human subjects. *JAMA* 2013;310(20):2191-4. doi: 10.1001/jama.2013.281053  
42  
43 437  
44  
45  
46  
47  
48  
49  
50  
51  
52  
53  
54  
55  
56  
57  
58  
59  
60

439 **Authors' contributions:** This study was conceptualised by RG and AF, but all authors contributed  
 440 equally to the final methodology. JBE, RG and AF recruited the participants. SA and HE hosted the  
 441 survey, performed data collection and analysis. All authors significantly contributed to the writing of  
 442 the manuscript. The manuscript was reviewed and edited prior to submission, and all authors agreed  
 443 on the final version.

444 **Funding statement:** This work is supported by an unrestricted grant from the Department of  
 445 Anaesthesiology and Pain Medicine, Inselspital, Bern University Hospital.

446 **Competing interest statement:** The authors have no competing interests to declare

448 **Figure 1:** Study timeline.

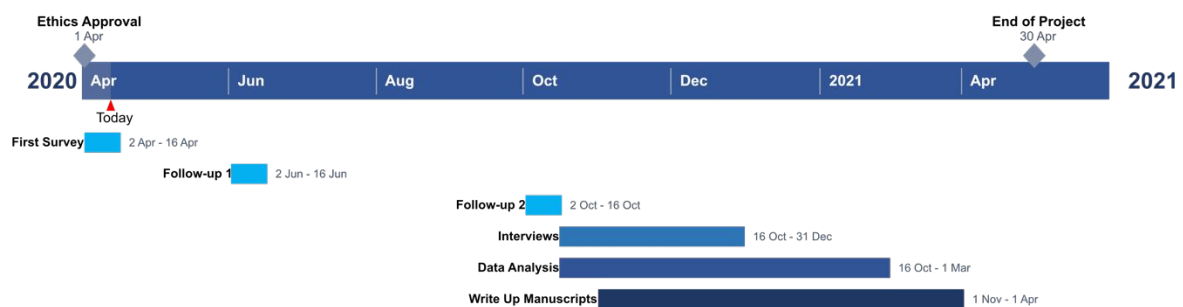

449

450

451 **Supplemental Digital Content 1 – Online Questionnaire**

452 **Supplemental Digital Content 2 – DARVID guidance document for the interviews**

453

# COVID-19

Start of Block: Block 1

Q23

**Distress and Resilience of Healthcare Professionals during the COVID-19-Pandemic (DARVID): An observational longitudinal questionnaire trial** We invite you to participate in our 9-month study on the association of psychological distress and coping strategies of healthcare professionals during the current COVID-19-pandemic in Europe.

Healthcare professionals who participate in this study will help to gain a better understanding of work-related distress, psychological health and resilience factors in the current pandemic outbreak. These results will serve to develop specific interventions to foster the individual and organizational resilience of medical healthcare providers in the future. This is why your contribution is very important.

When you enter the survey, you will be asked to complete questionnaires. This will take between 10 to 15 minutes.

Most of these questionnaires have already been validated. We could not modify questions, thus some statements might sound strange in the current situation. Please answer as accurately as possible. As per study design, it will not be possible to skip questions. We need to collect all the information.

Your participation in this study is voluntary. If you decide at any time not to participate, it will not affect the care, services or benefits to which you are entitled. Answering these questions has no known risks for you. If you interrupt in the answering process you may return later as your answers are temporarily saved for 7 days after your last activity.

All information taken from the study will be coded for analysis to protect each subject's identity. However, we will need your e-mail for further contact. We expect to repeat the survey in the summer and autumn. No identifying information will be used when discussing or reporting data. The investigators will keep all files and data collected safely at the departmental research server according to the Swiss law on human research. Once all data has been fully analyzed it will be kept for 10 years according to local research law.

The Bern Cantonal Ethics Committee has waived the need for ethical approval.

Prof. Dr. med. Robert Greif, MME, FERC  
University Hospital Bern  
Department of Anaesthesiology and Pain Medicine  
Freiburgstrasse 4  
CH-3010 Bern  
[robert.greif@insel.ch](mailto:robert.greif@insel.ch)

Dr. phil. Sandra Abegglen  
University of Bern  
Department of Health Psychology and Behavioural Medicine

1  
2  
3 Fabrikstrasse 8  
4 CH-3012 Bern  
5 [sandra.abegglen@psy.unibe.ch](mailto:sandra.abegglen@psy.unibe.ch)  
6  
7

---

8  
9 Q23 I have read the foregoing information. I consent voluntarily to participate in this study.

11  
12  Yes (1)

13  
14  No (2)

15  
16  
17  
18 End of Block: Block 1

---

19 Start of Block: Block 13

20  
21  
22 Q28 All information taken from the study will be coded to protect each subject's name. The  
23 study group needs your e-mail to contact you for the summer and fall questionnaires, but never  
24 ever identifying information will be used when discussing or reporting data and results of the  
25 study.  
26  
27

---

28  
29  
30 \*

31  
32  
33 Q29 Your e-mail address  
34  
35  
36  
37

---

38  
39  
40 Q30 The investigators will safely keep password protected all files and data safe at the  
41 departmental research server according to the Swiss law on human research. Once all data  
42 has been fully analyzed it will be kept for 10 years according to local research law.  
43  
44

45  
46 End of Block: Block 13

---

47 Start of Block: Block 2

48  
49 X→

50  
51  
52 Q34 In which country do you currently work?  
53

54 ▼ Afghanistan (1) ... Zimbabwe (1357)  
55  
56  
57  
58  
59  
60

1  
2  
3  
4  
5 Q32 In which city do you currently work?  
6  
7  
8 \_\_\_\_\_  
9  
10

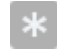

12  
13  
14 Q2 Age in years:  
15  
16  
17 \_\_\_\_\_  
18  
19

20  
21 Q3 Your gender?  
22

- 23  
24  Male (1)  
25  
26  Female (2)  
27  
28  Other (3)  
29  
30  
31

32 **End of Block: Block 2**  
33

34 **Start of Block: Block 12**  
35  
36

37 Q27

38 We need an informed consent from you. Otherwise you cannot participate.  
39  
40

41  
42 Your decision to participate in this study is complete voluntary. If you decide to not participate, it  
43 will not affect the care, services, or benefits to which you are entitled.  
44  
45

46  
47  
48 If you decide to participate in this study, please go back and indicate "yes".  
49  
50  
51

52 **End of Block: Block 12**  
53

54 **Start of Block: Block 3**  
55  
56  
57  
58  
59  
60

1  
2  
3 Q11 What is your profession?  
4

5  Nurse (1)  
6  
7

8  Physician (2)  
9

10  Midwife (3)  
11

12  Pre-hospital Technician (4)  
13

14  Other (what?) (5) \_\_\_\_\_  
15  
16  
17

18 -----  
19  
20  
21 Q33 Your main working place is:  
22

23  ICU (1)  
24

25  Anesthesia/Surgery (2)  
26

27  Emergency room (3)  
28

29  Ward (4)  
30

31  Other (where?) (5) \_\_\_\_\_  
32  
33  
34  
35

36 -----  
37  
38  
39 Q12 Have you had direct contact (i.e. diagnosed, treated or provided care) with COVID-19  
40 infected patients?  
41

42  Yes (1)  
43

44  No (2)  
45  
46  
47

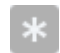

50  
51 Q10 How many years are you working in the healthcare system, since graduation?  
52  
53  
54 \_\_\_\_\_  
55  
56  
57  
58  
59  
60



1  
2  
3  
4  
5  
6 Q13 Do you belong to a risk population? (i.e. Over the Age of 65 years, High blood pressure,  
7 Diabetes, Cardiovascular disease, Chronic respiratory diseases, Conditions and therapies that  
8 weaken the immune system, Cancer)  
9

10  Yes (1)

11  
12  No (2)  
13  
14  
15

16 End of Block: Block 3

---

17 Start of Block: Block 4

18  
19  
20  
21 Q8 Do you share your household with other people?  
22

23  Yes (1)

24  
25  No (2)  
26  
27  
28

29  
30  
31 Q4 Are you in a relationship?  
32

33  Yes (1)

34  
35  No (2)  
36  
37  
38

39  
40  
41 Q5 Do you have children?  
42

43  Yes (1)

44  
45  No (2)  
46  
47  
48  
49  
50  
51  
52  
53  
54  
55  
56  
57  
58  
59  
60

1  
2  
3 Q15 Are you pregnant or are you living together with a pregnant woman?  
4  
5

6  Yes (1)  
7

8  No (2)  
9  
10  
11

12  
13 Q14 Do you have close contact in private to people of the risk population mentioned above?  
14  
15

16  Yes (1)  
17

18  No (2)  
19  
20  
21

22 **End of Block: Block 4**  
23

24 **Start of Block: Block 14**  
25

26 Q33 Are you infected with COVID-19?  
27  
28

29  Yes (1)  
30

31  No (2)  
32

33  Don't know (4)  
34  
35  
36

37  
38  
39 Q34 Have you been positively tested for COVID-19 antibodies?  
40  
41

42  Yes (1)  
43

44  No (2)  
45  
46  
47

48 **End of Block: Block 14**  
49

50 **Start of Block: Block 5**  
51  
52  
53  
54  
55  
56  
57  
58  
59  
60

1  
2  
3 Q17 Below is a list of statement about concerns with respect to COVID-19 (SFI Questionnaire).  
4 Please indicate how much you agree with each statement.  
5

|                                                                                                                                                                           | very little (1)       | (2)                   | (3)                   | (4)                   | very much (5)         |
|---------------------------------------------------------------------------------------------------------------------------------------------------------------------------|-----------------------|-----------------------|-----------------------|-----------------------|-----------------------|
| 6<br>7<br>8 To what<br>9 extent are<br>10 you<br>11 concerned<br>12 about<br>13 COVID-19?<br>14 (1)                                                                       | <input type="radio"/> |
| 15<br>16 To what<br>17 extent do you<br>18 believe that<br>19 COVID-19<br>20 could become<br>21 a "pandemic"<br>22 in you current<br>23 resident<br>24 country? (2)       | <input type="radio"/> |
| 25<br>26 How likely is<br>27 it that you<br>28 could become<br>29 infected with<br>30 COVID-19?<br>31 (3)                                                                 | <input type="radio"/> |
| 32<br>33 How likely is<br>34 it that<br>35 someone you<br>36 know could<br>37 become<br>38 infected with<br>39 COVID-19?<br>40 (4)                                        | <input type="radio"/> |
| 41<br>42 How quickly<br>43 do you<br>44 believe<br>45 contamination<br>46 from COVID-<br>47 19 is<br>48 spreading in<br>49 your current<br>50 resident<br>51 country? (5) | <input type="radio"/> |
| 52<br>53 How much<br>54 exposure<br>55 have you had                                                                                                                       | <input type="radio"/> |

1  
2  
3 to information  
4 about  
5 COVID-19?  
6 (6)  
7

8 If you did  
9 become  
10 infected with  
11 COVID-19, to  
12 what extent  
13 are you  
14 concerned  
15 that you will  
16 be severely ill?  
17 (7)  
18

19 To what  
20 extend has  
21 the threat of  
22 COVID-19  
23 influenced  
24 your  
25 decisions to  
26 be around  
27 people? (8)  
28

29 To what  
30 extend has  
31 the threat of  
32 COVID-19  
33 influenced  
34 your travel  
35 plans? (9)  
36

37 To what  
38 extend has  
39 the threat of  
40 COVID-19  
41 influenced  
42 your use of  
43 safety  
44 behaviors (  
45 e.g. hand  
46 sanitizer)?  
47 (10)  
48  
49  
50  
51

|                       |                       |                       |                       |                       |
|-----------------------|-----------------------|-----------------------|-----------------------|-----------------------|
| <input type="radio"/> |
| <input type="radio"/> |
| <input type="radio"/> |
| <input type="radio"/> |

For peer review only

52 End of Block: Block 5

53  
54  
55 Start of Block: Block 6  
56  
57  
58

1  
2  
3 Q21 Over **the last 2 weeks**, how often have you been bothered by any of the following  
4 problems?

5 (PHQ-9 Questionnaire)

| 6  | 7                     | 8                     | 9                              | 10                      |
|----|-----------------------|-----------------------|--------------------------------|-------------------------|
|    | Not at all (1)        | Several days (2)      | More than half<br>the days (3) | Nearly every day<br>(4) |
| 11 | <input type="radio"/> | <input type="radio"/> | <input type="radio"/>          | <input type="radio"/>   |
| 12 |                       |                       |                                |                         |
| 13 |                       |                       |                                |                         |
| 14 | <input type="radio"/> | <input type="radio"/> | <input type="radio"/>          | <input type="radio"/>   |
| 15 |                       |                       |                                |                         |
| 16 |                       |                       |                                |                         |
| 17 | <input type="radio"/> | <input type="radio"/> | <input type="radio"/>          | <input type="radio"/>   |
| 18 |                       |                       |                                |                         |
| 19 | <input type="radio"/> | <input type="radio"/> | <input type="radio"/>          | <input type="radio"/>   |
| 20 |                       |                       |                                |                         |
| 21 |                       |                       |                                |                         |
| 22 | <input type="radio"/> | <input type="radio"/> | <input type="radio"/>          | <input type="radio"/>   |
| 23 |                       |                       |                                |                         |
| 24 | <input type="radio"/> | <input type="radio"/> | <input type="radio"/>          | <input type="radio"/>   |
| 25 |                       |                       |                                |                         |
| 26 | <input type="radio"/> | <input type="radio"/> | <input type="radio"/>          | <input type="radio"/>   |
| 27 |                       |                       |                                |                         |
| 28 |                       |                       |                                |                         |
| 29 | <input type="radio"/> | <input type="radio"/> | <input type="radio"/>          | <input type="radio"/>   |
| 30 |                       |                       |                                |                         |
| 31 |                       |                       |                                |                         |
| 32 | <input type="radio"/> | <input type="radio"/> | <input type="radio"/>          | <input type="radio"/>   |
| 33 |                       |                       |                                |                         |
| 34 |                       |                       |                                |                         |
| 35 | <input type="radio"/> | <input type="radio"/> | <input type="radio"/>          | <input type="radio"/>   |
| 36 |                       |                       |                                |                         |
| 37 |                       |                       |                                |                         |
| 38 | <input type="radio"/> | <input type="radio"/> | <input type="radio"/>          | <input type="radio"/>   |
| 39 |                       |                       |                                |                         |
| 40 |                       |                       |                                |                         |
| 41 | <input type="radio"/> | <input type="radio"/> | <input type="radio"/>          | <input type="radio"/>   |
| 42 |                       |                       |                                |                         |
| 43 |                       |                       |                                |                         |
| 44 | <input type="radio"/> | <input type="radio"/> | <input type="radio"/>          | <input type="radio"/>   |
| 45 |                       |                       |                                |                         |
| 46 |                       |                       |                                |                         |
| 47 | <input type="radio"/> | <input type="radio"/> | <input type="radio"/>          | <input type="radio"/>   |
| 48 |                       |                       |                                |                         |
| 49 |                       |                       |                                |                         |
| 50 | <input type="radio"/> | <input type="radio"/> | <input type="radio"/>          | <input type="radio"/>   |
| 51 |                       |                       |                                |                         |
| 52 |                       |                       |                                |                         |
| 53 |                       |                       |                                |                         |
| 54 |                       |                       |                                |                         |
| 55 |                       |                       |                                |                         |
| 56 |                       |                       |                                |                         |
| 57 |                       |                       |                                |                         |
| 58 |                       |                       |                                |                         |
| 59 |                       |                       |                                |                         |
| 60 |                       |                       |                                |                         |

1  
2  
3  
4  
5  
6  
7  
8  
9  
10  
11  
12  
13  
14  
15  
16  
17  
18  
19  
20  
21  
22  
23  
24  
25  
26  
27  
28  
29  
30  
31  
32  
33  
34  
35  
36  
37  
38  
39  
40  
41  
42  
43  
44  
45  
46  
47  
48  
49  
50  
51  
52  
53  
54  
55  
56  
57  
58  
59  
60

lot more than usual (8)  
Thoughts that you would be better off dead or of hurting yourself in some way (9)

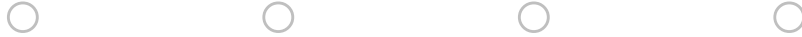

End of Block: Block 6

Start of Block: Block 7

Q24 .

0 (Not at all) 10 (Extremely)

I am afraid I will become infected with COVID-19 while on the job. ()

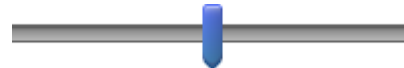

Q25 .

0 (Not at all) 10 (Extremely)

How stressful is your current work situation for you? ()

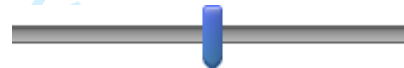

End of Block: Block 7

Start of Block: Block 8

## Q19

Please read each statement below, and indicate how distressing each difficulty has been for you during the **past 7 days** with respect to **your current work situation**. How much have you been distressed or bothered by these difficulties? (IES-6-questionnaire)

|                                                                                           | Not at all (1)        | A little bit (2)      | Moderately (3)        | Quite a bit (4)       | Extremely (5)         |
|-------------------------------------------------------------------------------------------|-----------------------|-----------------------|-----------------------|-----------------------|-----------------------|
| I thought about it when I didn't mean to. (1)                                             | <input type="radio"/> |
| I felt watchful or on-guard. (2)                                                          | <input type="radio"/> |
| Other things kept making me think about it. (3)                                           | <input type="radio"/> |
| I was aware that I still had a lot of feelings about it, but I didn't deal with them. (4) | <input type="radio"/> |
| I tried not to think about it. (5)                                                        | <input type="radio"/> |
| I had trouble concentrating. (6)                                                          | <input type="radio"/> |

End of Block: Block 8

Start of Block: Block 9

Q25 How do you personally find your current job and work situation in general?

|                   | 1 (1)                 | 2 (2)                 | 3 (3)                 | 4 (4)                 | 5 (5)                 | 6 (6)                 | 7 (7)                 |                         |
|-------------------|-----------------------|-----------------------|-----------------------|-----------------------|-----------------------|-----------------------|-----------------------|-------------------------|
| manageable        | <input type="radio"/> | unmanageable            |
| meaningless       | <input type="radio"/> | meaningful              |
| structured        | <input type="radio"/> | unstructured            |
| easy to influence | <input type="radio"/> | impossible to influence |
| insignificant     | <input type="radio"/> | significant             |
| clear             | <input type="radio"/> | unclear                 |
| controllable      | <input type="radio"/> | uncontrollable          |
| unrewarding       | <input type="radio"/> | rewarding               |
| predictable       | <input type="radio"/> | unpredictable           |

End of Block: Block 9

Start of Block: Block 10



## Q22

For each statement below, please make one selection that best indicates how much you agree with the following statements as they apply to you over the **last 4 weeks**. (CD-RISC Questionnaire)

If a particular situation has not occurred recently, answer according to how you think you would have felt.

|                                                                             | not true at all<br>(1) | rarely true (2)       | sometimes<br>true (3) | often true (4)        | true nearly all<br>of the time (5) |
|-----------------------------------------------------------------------------|------------------------|-----------------------|-----------------------|-----------------------|------------------------------------|
| I am able to adapt when changes occur. (1)                                  | <input type="radio"/>  | <input type="radio"/> | <input type="radio"/> | <input type="radio"/> | <input type="radio"/>              |
| I can deal with whatever comes my way. (2)                                  | <input type="radio"/>  | <input type="radio"/> | <input type="radio"/> | <input type="radio"/> | <input type="radio"/>              |
| I try to see the humorous side of things when I am faced with problems. (3) | <input type="radio"/>  | <input type="radio"/> | <input type="radio"/> | <input type="radio"/> | <input type="radio"/>              |
| Having to cope with stress can make me stronger. (4)                        | <input type="radio"/>  | <input type="radio"/> | <input type="radio"/> | <input type="radio"/> | <input type="radio"/>              |
| I tend to bounce back after illness, injury, or other hardships. (5)        | <input type="radio"/>  | <input type="radio"/> | <input type="radio"/> | <input type="radio"/> | <input type="radio"/>              |
| I believe I can achieve my goals, even if there are obstacles. (6)          | <input type="radio"/>  | <input type="radio"/> | <input type="radio"/> | <input type="radio"/> | <input type="radio"/>              |
| Under pressure, I stay focused and think clearly. (7)                       | <input type="radio"/>  | <input type="radio"/> | <input type="radio"/> | <input type="radio"/> | <input type="radio"/>              |

1  
2  
3  
4  
5  
6  
7  
8  
9  
10  
11  
12  
13  
14  
15  
16  
17  
18  
19  
20  
21  
22  
23  
24  
25  
26  
27  
28  
29  
30  
31  
32  
33  
34  
35  
36  
37  
38  
39  
40  
41  
42  
43  
44  
45  
46  
47  
48  
49  
50  
51  
52  
53  
54  
55  
56  
57  
58  
59  
60

I am not easily discouraged by failure. (8)

I think of myself as a strong person when dealing with life's challenges and difficulties (9)

I am able to handle unpleasant or painful feelings like sadness, fear, and anger. (10)

For peer review only

End of Block: Block 10

---

Start of Block: Default Question Block

Q16 Finally, please indicate how much you agree at present with each statement. (PVD Questionnaire)

|                                                                                       | strongly disagree (1) | (2)                   | (3)                   | (4)                   | (5)                   | (6)                   | strongly agree (7)    |
|---------------------------------------------------------------------------------------|-----------------------|-----------------------|-----------------------|-----------------------|-----------------------|-----------------------|-----------------------|
| In general, I am very susceptible to colds, flu and other infectious diseases. (1)    | <input type="radio"/> |
| I am unlikely to catch a cold, flu or other illness, even if it's "going around". (2) | <input type="radio"/> |
| If an illness is "going around", i will get it. (3)                                   | <input type="radio"/> |
| My immune system protects me from most illnesses that other people get. (4)           | <input type="radio"/> |
| I am more likely than the people around me to catch an infectious disease. (5)        | <input type="radio"/> |
| My past experiences make me believe I am not likely to get sick even when             | <input type="radio"/> |

1  
2  
3 my friends  
4 are sick. (6)  
5

6 I have a  
7 history of  
8 susceptibility  
9 to infectious  
10 disease. (7)  
11

12 I prefer to  
13 wash my  
14 hands pretty  
15 soon after  
16 shaking  
17 someone's  
18 hand. (8)  
19

20 I avoid using  
21 public  
22 telephones  
23 because of  
24 the risk that i  
25 may catch  
26 something  
27 from the  
28 previous  
29 user. (9)  
30

31 I do not like  
32 to write with  
33 a pencil  
34 someone  
35 else has  
36 obviously  
37 chewed on.  
38 (10)  
39

40 I dislike  
41 wearing  
42 used clothes  
43 because you  
44 do not know  
45 what the last  
46 person who  
47 wore it was  
48 like. (11)  
49

50 I am  
51 comfortable  
52 sharing a  
53 water bottle  
54 with a friend.  
55  
56  
57  
58  
59  
60

|                       |                       |                       |                       |                       |                       |                       |
|-----------------------|-----------------------|-----------------------|-----------------------|-----------------------|-----------------------|-----------------------|
| <input type="radio"/> |
| <input type="radio"/> |
| <input type="radio"/> |
| <input type="radio"/> |
| <input type="radio"/> |
| <input type="radio"/> |

For peer review only

1  
2  
3  
4  
5  
6  
7  
8  
9  
10  
11  
12  
13  
14  
15  
16  
17  
18  
19  
20  
21  
22  
23  
24  
25  
26  
27  
28  
29  
30  
31  
32  
33  
34  
35  
36  
37  
38  
39  
40  
41  
42  
43  
44  
45  
46  
47  
48  
49  
50  
51  
52  
53  
54  
55  
56  
57  
58  
59  
60

(12)

It really bothers me when people sneeze without covering their mouths. (13)

It does not make me anxious to be around sick people. (14)

My hands do not feel dirty after touching money. (15)

|                       |                       |                       |                       |                       |                       |                       |
|-----------------------|-----------------------|-----------------------|-----------------------|-----------------------|-----------------------|-----------------------|
| <input type="radio"/> |
| <input type="radio"/> |
| <input type="radio"/> |

For peer review only

End of Block: Default Question Block

Start of Block: Block 11

Q32 Do you have any comments or suggestions?

---



---



---



---



---

End of Block: Block 11

1  
2  
3 Last page:  
4

5 You have now completed the full questionnaire – Thank you!  
6

7  
8 Your contribution in this study is of utmost importance to gain insight on healthcare  
9 providers' resilience in the present time.  
10

11 We will ask you to fill in another shorter questionnaire in summer and in autumn.  
12

13 Kind regards,  
14

15  
16 Prof. Dr. Robert Greif, MME, FERC  
17 [robert.greif@insel.ch](mailto:robert.greif@insel.ch)

18  
19 Dr. phil. Sandra Abegglen  
20 [sandra.abegglen@psy.unibe.ch](mailto:sandra.abegglen@psy.unibe.ch)  
21  
22  
23  
24  
25  
26  
27  
28  
29  
30  
31  
32  
33  
34  
35  
36  
37  
38  
39  
40  
41  
42  
43  
44  
45  
46  
47  
48  
49  
50  
51  
52  
53  
54  
55  
56  
57  
58  
59  
60

## Interview Guide for Semi-Structured Interviews: Distress and Resilience of Healthcare Professionals during the COVID-19-Pandemic (DARVID)

### Before we begin:

1. Extend your greetings, and thank all of the participants for being there and for their participation. Remind them that the interview will be video and audio recorded, and then viewed by the investigating team, for coding and transcription purposes. Tell them that you guarantee that all information will remain anonymous.
2. Ask for their written voluntary consent to participate in the interview.
3. Explain that, first and foremost, our interest in the focus group is to evaluate the ideas of the participants and their contributions.
4. Set the ground rules for group discussion (i.e., role of facilitators, role of the assistant, audio and video recording, raising hands, do not speak at the same time).
5. **Start the video and audio-recording devices**

### Introduction (5 minutes)

1. Explanation that the focus group will be divided into different sections.
2. Short presentation round.
3. Experience and background of participants:
  - Age (Make a note on sex)
  - Profession/ in the front line?
  - Previous work experience
4. Were you working in your usual workplace during the pandemic? If not, where?
5. Ask about the experience of filling in the questionnaire, and what the participants thought was the purpose of it.

**Survey (45 minutes)**

1. *Explain briefly the purpose of the study (association of resilience and a work-related sense of coherence with development of mental health symptoms).*

**Stress / Personal circumstances**

2. What was the most relevant stress factor related to work and to private life during the pandemic?

**Perceived vulnerability**

3. Were you especially afraid of being contaminated? When?
4. What did you do to manage your worries about contamination?

**Traumatic stress**

5. How was your sleeping quality and quantity during the special situation of the COVID-19 pandemic compared to before the pandemic arrived?
  - a. Did you have nightmares during the COVID-19 pandemic, or do you at present?
  - b. Did you have difficulties falling asleep during the COVID-19 pandemic, or do you at present?
  - c. Did you have difficulties staying asleep for several hours?
6. If you remember your working situation during the COVID-19 pandemic: Were you exposed to a very stressful event that was life-threatening for you or another person, which was frightening or distressing for you during the COVID-19 pandemic? (If you feel ok to describe this event a little bit more, please do it)
  - a. What do you do if distressing and intense memories come up?
  - b. Do you experience physical reactions or severe distress when you are reminded or relating to this event / or your working situation during the COVID-19 pandemic?  
(Which?)



c. What do you do if physical reactions or severe distress come up?

7. Did you notice any difference in your emotional state during the COVID-19 pandemic (i.e. feeling more aggressive, feeling numb, being hypervigilant, feeling guilty)?

### **Depression**

8. The following questions will focus on your state of depression related to your working situation during the COVID-19 pandemic

a. Have you felt depressed? In which situation?

b. What have you done to feel more comfortable?

9. Did you experience appetite disorders (poor appetite/ overeating), panic attacks, worry all the time, etc?

### **Resilience**

10. What do you think resilience is?

a. Did you feel especially resilient during the pandemic?

b. What was the most important individual factor and social factor that improved your resilience during the pandemic?

c. What would be helpful for you to enhance your resilience at work in the future?

d. What can your organisation do to enhance your resilience at work in the future?

### **Work-related sense of coherence**

11. When you think about your working situation during the COVID-19 pandemic, what was different during the pandemic?

12. What was it like to provide care for COVID-19 patients?

13. How do you feel your hospital performed during the pandemic?

10  
11  
12  
13  
14  
15  
16  
17  
18  
19  
20  
21  
22  
23  
24  
25  
26  
27  
28  
29  
30  
31  
32  
33  
34  
35  
36  
37  
38  
39  
40  
41  
42  
43  
44  
45  
46  
47  
48  
49  
50  
51  
52  
53  
54  
55  
56  
57  
58  
59  
60

**Final remarks (5 minutes)**

1. If you advise your past self (six months ago) on how to react to the Corona pandemic, what would your main advice be?
2. Thank you (distribution of an incentive voucher?)
3. **Stop video and audio-recording devices**

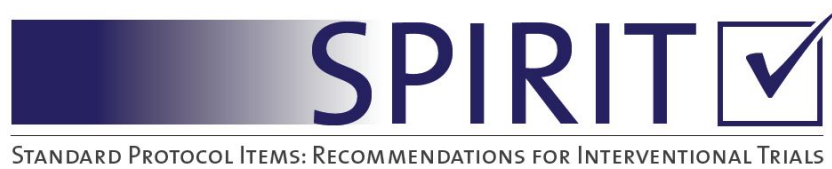

SPIRIT 2013 Checklist: Recommended items to address in a clinical trial protocol and related documents\*

| Section/item                      | Item No | Description                                                                                                                                                                                                                                                                                                    |
|-----------------------------------|---------|----------------------------------------------------------------------------------------------------------------------------------------------------------------------------------------------------------------------------------------------------------------------------------------------------------------|
| <b>Administrative information</b> |         |                                                                                                                                                                                                                                                                                                                |
| Title                             | 1       | Descriptive title identifying the study design, population, interventions, and, if applicable, trial acronym → <a href="#">page 1</a>                                                                                                                                                                          |
| Trial registration                | 2a      | Trial identifier and registry name. If not yet registered, name of intended registry → <a href="#">page 2</a>                                                                                                                                                                                                  |
|                                   | 2b      | All items from the World Health Organization Trial Registration Data Set → <a href="#">n/a</a>                                                                                                                                                                                                                 |
| Protocol version                  | 3       | Date and version identifier → <a href="#">page 1</a>                                                                                                                                                                                                                                                           |
| Funding                           | 4       | Sources and types of financial, material, and other support → <a href="#">page 17</a>                                                                                                                                                                                                                          |
| Roles and responsibilities        | 5a      | Names, affiliations, and roles of protocol contributors → <a href="#">page 1</a>                                                                                                                                                                                                                               |
|                                   | 5b      | Name and contact information for the trial sponsor → <a href="#">n/a</a>                                                                                                                                                                                                                                       |
|                                   | 5c      | Role of study sponsor and funders, if any, in study design; collection, management, analysis, and interpretation of data; writing of the report; and the decision to submit the report for publication, including whether they will have ultimate authority over any of these activities → <a href="#">n/a</a> |
|                                   | 5d      | Composition, roles, and responsibilities of the coordinating centre, steering committee, endpoint adjudication committee, data management team, and other individuals or groups overseeing the trial, if applicable (see Item 21a for data monitoring committee) → <a href="#">n/a</a>                         |
| <b>Introduction</b>               |         |                                                                                                                                                                                                                                                                                                                |
| Background and rationale          | 6a      | Description of research question and justification for undertaking the trial, including summary of relevant studies (published and unpublished) examining benefits and harms for each intervention → <a href="#">page 4-6</a>                                                                                  |
|                                   | 6b      | Explanation for choice of comparators → <a href="#">n/a</a>                                                                                                                                                                                                                                                    |
| Objectives                        | 7       | Specific objectives or hypotheses → <a href="#">page 4-6</a>                                                                                                                                                                                                                                                   |

1  
2  
3  
4  
5  
6  
7  
8  
9  
10  
11  
12  
13  
14  
15  
16  
17  
18  
19  
20  
21  
22  
23  
24  
25  
26  
27  
28  
29  
30  
31  
32  
33  
34  
35  
36  
37  
38  
39  
40  
41  
42  
43  
44  
45  
46  
47  
48  
49  
50  
51  
52  
53  
54  
55  
56  
57  
58  
59  
60

|              |   |                                                                                                                                                                                                                                    |
|--------------|---|------------------------------------------------------------------------------------------------------------------------------------------------------------------------------------------------------------------------------------|
| Trial design | 8 | Description of trial design including type of trial (eg, parallel group, crossover, factorial, single group), allocation ratio, and framework (eg, superiority, equivalence, noninferiority, exploratory) → <a href="#">page 6</a> |
|--------------|---|------------------------------------------------------------------------------------------------------------------------------------------------------------------------------------------------------------------------------------|

### Methods: Participants, interventions, and outcomes

|               |   |                                                                                                                                                                                                                 |
|---------------|---|-----------------------------------------------------------------------------------------------------------------------------------------------------------------------------------------------------------------|
| Study setting | 9 | Description of study settings (eg, community clinic, academic hospital) and list of countries where data will be collected. Reference to where list of study sites can be obtained → <a href="#">page 6-7,9</a> |
|---------------|---|-----------------------------------------------------------------------------------------------------------------------------------------------------------------------------------------------------------------|

|                      |    |                                                                                                                                                                                                                       |
|----------------------|----|-----------------------------------------------------------------------------------------------------------------------------------------------------------------------------------------------------------------------|
| Eligibility criteria | 10 | Inclusion and exclusion criteria for participants. If applicable, eligibility criteria for study centres and individuals who will perform the interventions (eg, surgeons, psychotherapists) → <a href="#">page 7</a> |
|----------------------|----|-----------------------------------------------------------------------------------------------------------------------------------------------------------------------------------------------------------------------|

|               |     |                                                                                                                                                               |
|---------------|-----|---------------------------------------------------------------------------------------------------------------------------------------------------------------|
| Interventions | 11a | Interventions for each group with sufficient detail to allow replication, including how and when they will be administered → <b>n/a (observational study)</b> |
|---------------|-----|---------------------------------------------------------------------------------------------------------------------------------------------------------------|

|  |     |                                                                                                                                                                                                                                   |
|--|-----|-----------------------------------------------------------------------------------------------------------------------------------------------------------------------------------------------------------------------------------|
|  | 11b | Criteria for discontinuing or modifying allocated interventions for a given trial participant (eg, drug dose change in response to harms, participant request, or improving/worsening disease) → <b>n/a (observational study)</b> |
|--|-----|-----------------------------------------------------------------------------------------------------------------------------------------------------------------------------------------------------------------------------------|

|  |     |                                                                                                                                                                                      |
|--|-----|--------------------------------------------------------------------------------------------------------------------------------------------------------------------------------------|
|  | 11c | Strategies to improve adherence to intervention protocols, and any procedures for monitoring adherence (eg, drug tablet return, laboratory tests) → <b>n/a (observational study)</b> |
|--|-----|--------------------------------------------------------------------------------------------------------------------------------------------------------------------------------------|

|  |     |                                                                                                                                  |
|--|-----|----------------------------------------------------------------------------------------------------------------------------------|
|  | 11d | Relevant concomitant care and interventions that are permitted or prohibited during the trial → <b>n/a (observational study)</b> |
|--|-----|----------------------------------------------------------------------------------------------------------------------------------|

|          |    |                                                                                                                                                                                                                                                                                                                                                                                                                                                               |
|----------|----|---------------------------------------------------------------------------------------------------------------------------------------------------------------------------------------------------------------------------------------------------------------------------------------------------------------------------------------------------------------------------------------------------------------------------------------------------------------|
| Outcomes | 12 | Primary, secondary, and other outcomes, including the specific measurement variable (eg, systolic blood pressure), analysis metric (eg, change from baseline, final value, time to event), method of aggregation (eg, median, proportion), and time point for each outcome. Explanation of the clinical relevance of chosen efficacy and harm outcomes is strongly recommended → <a href="#">page 7-8 (quantitative phase) &amp; 9-10 (qualitative phase)</a> |
|----------|----|---------------------------------------------------------------------------------------------------------------------------------------------------------------------------------------------------------------------------------------------------------------------------------------------------------------------------------------------------------------------------------------------------------------------------------------------------------------|

|                      |    |                                                                                                                                                                                                            |
|----------------------|----|------------------------------------------------------------------------------------------------------------------------------------------------------------------------------------------------------------|
| Participant timeline | 13 | Time schedule of enrolment, interventions (including any run-ins and washouts), assessments, and visits for participants. A schematic diagram is highly recommended (see Figure) → <a href="#">page 17</a> |
|----------------------|----|------------------------------------------------------------------------------------------------------------------------------------------------------------------------------------------------------------|

|             |    |                                                                                                                                                                                                                                                                         |
|-------------|----|-------------------------------------------------------------------------------------------------------------------------------------------------------------------------------------------------------------------------------------------------------------------------|
| Sample size | 14 | Estimated number of participants needed to achieve study objectives and how it was determined, including clinical and statistical assumptions supporting any sample size calculations → <a href="#">page 8 (quantitative phase) &amp; page 9-10 (qualitative phase)</a> |
|-------------|----|-------------------------------------------------------------------------------------------------------------------------------------------------------------------------------------------------------------------------------------------------------------------------|

|             |    |                                                                                                              |
|-------------|----|--------------------------------------------------------------------------------------------------------------|
| Recruitment | 15 | Strategies for achieving adequate participant enrolment to reach target sample size → <a href="#">page 7</a> |
|-------------|----|--------------------------------------------------------------------------------------------------------------|

**Methods: Assignment of interventions (for controlled trials) → n/a (observational study)**

## Allocation:

- 1  
2  
3  
4 Sequence generation 16a Method of generating the allocation sequence (eg, computer-generated random numbers), and list of any factors for stratification. To reduce predictability of a random sequence, details of any planned restriction (eg, blocking) should be provided in a separate document that is unavailable to those who enrol participants or assign interventions → **n/a (observational study)**
- 5  
6  
7  
8  
9  
10  
11  
12 Allocation concealment mechanism 16b Mechanism of implementing the allocation sequence (eg, central telephone; sequentially numbered, opaque, sealed envelopes), describing any steps to conceal the sequence until interventions are assigned → **n/a (observational study)**
- 13  
14  
15  
16  
17  
18 Implementation 16c Who will generate the allocation sequence, who will enrol participants, and who will assign participants to interventions → **n/a (observational study)**
- 19  
20  
21  
22 Blinding (masking) 17a Who will be blinded after assignment to interventions (eg, trial participants, care providers, outcome assessors, data analysts), and how → **n/a (observational study)**
- 23  
24  
25  
26  
27 17b If blinded, circumstances under which unblinding is permissible, and procedure for revealing a participant's allocated intervention during the trial → **n/a (observational study)**
- 28  
29  
30

**Methods: Data collection, management, and analysis**

- 31  
32  
33 Data collection methods 18a Plans for assessment and collection of outcome, baseline, and other trial data, including any related processes to promote data quality (eg, duplicate measurements, training of assessors) and a description of study instruments (eg, questionnaires, laboratory tests) along with their reliability and validity, if known. Reference to where data collection forms can be found, if not in the protocol → **page 7-9 (quantitative phase) & page 9-10 (qualitative phase)**
- 34  
35  
36  
37  
38  
39  
40  
41  
42 18b Plans to promote participant retention and complete follow-up, including list of any outcome data to be collected for participants who discontinue or deviate from intervention protocols → **n/a**
- 43  
44  
45  
46  
47 Data management 19 Plans for data entry, coding, security, and storage, including any related processes to promote data quality (eg, double data entry; range checks for data values). Reference to where details of data management procedures can be found, if not in the protocol → **page 11**
- 48  
49  
50  
51  
52  
53  
54 Statistical methods 20a Statistical methods for analysing primary and secondary outcomes. Reference to where other details of the statistical analysis plan can be found, if not in the protocol → **page 9 (quantitative phase) & page 10 (qualitative phase)**
- 55  
56  
57  
58  
59  
60

- 1  
2  
3  
4  
5  
6  
7  
8  
9
- 20b Methods for any additional analyses (eg, subgroup and adjusted analyses) → **n/a**
- 20c Definition of analysis population relating to protocol non-adherence (eg, as randomised analysis), and any statistical methods to handle missing data (eg, multiple imputation) → **n/a**

### 10 **Methods: Monitoring**

- 11  
12  
13  
14  
15  
16  
17  
18  
19  
20  
21  
22  
23  
24  
25  
26  
27  
28  
29  
30  
31
- Data monitoring 21a Composition of data monitoring committee (DMC); summary of its role and reporting structure; statement of whether it is independent from the sponsor and competing interests; and reference to where further details about its charter can be found, if not in the protocol. Alternatively, an explanation of why a DMC is not needed → **page 11**
- 21b Description of any interim analyses and stopping guidelines, including who will have access to these interim results and make the final decision to terminate the trial → **n/a**
- Harms 22 Plans for collecting, assessing, reporting, and managing solicited and spontaneously reported adverse events and other unintended effects of trial interventions or trial conduct → **n/a**
- Auditing 23 Frequency and procedures for auditing trial conduct, if any, and whether the process will be independent from investigators and the sponsor → **n/a**

### 32 **Ethics and dissemination**

- 33  
34  
35  
36  
37  
38  
39  
40  
41  
42  
43  
44  
45  
46  
47  
48  
49  
50  
51  
52  
53  
54  
55  
56  
57  
58  
59  
60
- Research ethics approval 24 Plans for seeking research ethics committee/institutional review board (REC/IRB) approval → **page 10-11**
- Protocol amendments 25 Plans for communicating important protocol modifications (eg, changes to eligibility criteria, outcomes, analyses) to relevant parties (eg, investigators, REC/IRBs, trial participants, trial registries, journals, regulators) → **n/a**
- Consent or assent 26a Who will obtain informed consent or assent from potential trial participants or authorised surrogates, and how (see Item 32) → **page 10-11**
- 26b Additional consent provisions for collection and use of participant data and biological specimens in ancillary studies, if applicable → **n/a**
- Confidentiality 27 How personal information about potential and enrolled participants will be collected, shared, and maintained in order to protect confidentiality before, during, and after the trial → **page 10-11**
- Declaration of interests 28 Financial and other competing interests for principal investigators for the overall trial and each study site → **page 17**

|    |                               |     |                                                                                                                                                                                                                                                                                                               |
|----|-------------------------------|-----|---------------------------------------------------------------------------------------------------------------------------------------------------------------------------------------------------------------------------------------------------------------------------------------------------------------|
| 1  |                               |     |                                                                                                                                                                                                                                                                                                               |
| 2  | Access to data                | 29  | Statement of who will have access to the final trial dataset, and disclosure of contractual agreements that limit such access for investigators → <a href="#">page 10-11</a>                                                                                                                                  |
| 3  |                               |     |                                                                                                                                                                                                                                                                                                               |
| 4  |                               |     |                                                                                                                                                                                                                                                                                                               |
| 5  |                               |     |                                                                                                                                                                                                                                                                                                               |
| 6  | Ancillary and post-trial care | 30  | Provisions, if any, for ancillary and post-trial care, and for compensation to those who suffer harm from trial participation → <a href="#">n/a</a>                                                                                                                                                           |
| 7  |                               |     |                                                                                                                                                                                                                                                                                                               |
| 8  |                               |     |                                                                                                                                                                                                                                                                                                               |
| 9  | Dissemination policy          | 31a | Plans for investigators and sponsor to communicate trial results to participants, healthcare professionals, the public, and other relevant groups (eg, via publication, reporting in results databases, or other data sharing arrangements), including any publication restrictions → <a href="#">page 12</a> |
| 10 |                               |     |                                                                                                                                                                                                                                                                                                               |
| 11 |                               |     |                                                                                                                                                                                                                                                                                                               |
| 12 |                               |     |                                                                                                                                                                                                                                                                                                               |
| 13 |                               |     |                                                                                                                                                                                                                                                                                                               |
| 14 |                               |     |                                                                                                                                                                                                                                                                                                               |
| 15 |                               |     |                                                                                                                                                                                                                                                                                                               |
| 16 |                               | 31b | Authorship eligibility guidelines and any intended use of professional writers → <a href="#">page 17</a>                                                                                                                                                                                                      |
| 17 |                               |     |                                                                                                                                                                                                                                                                                                               |
| 18 |                               |     |                                                                                                                                                                                                                                                                                                               |
| 19 |                               |     |                                                                                                                                                                                                                                                                                                               |
| 20 |                               | 31c | Plans, if any, for granting public access to the full protocol, participant-level dataset, and statistical code → <a href="#">page 11-12</a>                                                                                                                                                                  |
| 21 |                               |     |                                                                                                                                                                                                                                                                                                               |
| 22 |                               |     |                                                                                                                                                                                                                                                                                                               |
| 23 | <b>Appendices</b>             |     |                                                                                                                                                                                                                                                                                                               |
| 24 |                               |     |                                                                                                                                                                                                                                                                                                               |
| 25 | Informed consent materials    | 32  | Model consent form and other related documentation given to participants and authorised surrogates → <a href="#">page 10-11 &amp; SDC1, page 1</a>                                                                                                                                                            |
| 26 |                               |     |                                                                                                                                                                                                                                                                                                               |
| 27 |                               |     |                                                                                                                                                                                                                                                                                                               |
| 28 |                               |     |                                                                                                                                                                                                                                                                                                               |
| 29 | Biological specimens          | 33  | Plans for collection, laboratory evaluation, and storage of biological specimens for genetic or molecular analysis in the current trial and for future use in ancillary studies, if applicable → <a href="#">n/a</a>                                                                                          |
| 30 |                               |     |                                                                                                                                                                                                                                                                                                               |
| 31 |                               |     |                                                                                                                                                                                                                                                                                                               |
| 32 |                               |     |                                                                                                                                                                                                                                                                                                               |
| 33 |                               |     |                                                                                                                                                                                                                                                                                                               |

---

\*It is strongly recommended that this checklist be read in conjunction with the SPIRIT 2013 Explanation & Elaboration for important clarification on the items. Amendments to the protocol should be tracked and dated. The SPIRIT checklist is copyrighted by the SPIRIT Group under the Creative Commons "[Attribution-NonCommercial-NoDerivs 3.0 Unported](#)" license.

# BMJ Open

## Distress and resilience of healthcare professionals during the COVID-19 pandemic (DARVID): study protocol for a mixed-methods research project

|                                 |                                                                                                                                                                                                                                                                                                                                                                                                                                                                                                                                                                                                    |
|---------------------------------|----------------------------------------------------------------------------------------------------------------------------------------------------------------------------------------------------------------------------------------------------------------------------------------------------------------------------------------------------------------------------------------------------------------------------------------------------------------------------------------------------------------------------------------------------------------------------------------------------|
| Journal:                        | <i>BMJ Open</i>                                                                                                                                                                                                                                                                                                                                                                                                                                                                                                                                                                                    |
| Manuscript ID                   | bmjopen-2020-039832.R1                                                                                                                                                                                                                                                                                                                                                                                                                                                                                                                                                                             |
| Article Type:                   | Protocol                                                                                                                                                                                                                                                                                                                                                                                                                                                                                                                                                                                           |
| Date Submitted by the Author:   | 29-May-2020                                                                                                                                                                                                                                                                                                                                                                                                                                                                                                                                                                                        |
| Complete List of Authors:       | Fuchs, Alexander; Inselspital University Hospital Bern, Department of Anaesthesiology and Pain Medicine<br>Abegglen, Sandra; University of Bern, Department of Health Psychology and Behavioural Medicine<br>Berger-Estilita, Joana; Inselspital University Hospital Bern, Department of Anaesthesiology and Pain Medicine<br>Greif, Robert ; Inselspital University Hospital Bern, Department of Anaesthesiology and Pain Medicine; Sigmund Freud Private University Vienna, School of Medicine<br>Eigenmann, Helen; University of Bern, Department of Health Psychology and Behavioural Medicine |
| <b>Primary Subject Heading</b>: | Mental health                                                                                                                                                                                                                                                                                                                                                                                                                                                                                                                                                                                      |
| Secondary Subject Heading:      | Research methods, Infectious diseases, General practice / Family practice, Nursing, Public health                                                                                                                                                                                                                                                                                                                                                                                                                                                                                                  |
| Keywords:                       | MENTAL HEALTH, Anxiety disorders < PSYCHIATRY, Depression & mood disorders < PSYCHIATRY, Public health < INFECTIOUS DISEASES, PRIMARY CARE, STATISTICS & RESEARCH METHODS                                                                                                                                                                                                                                                                                                                                                                                                                          |
|                                 |                                                                                                                                                                                                                                                                                                                                                                                                                                                                                                                                                                                                    |

SCHOLARONE™  
Manuscripts





I, the Submitting Author has the right to grant and does grant on behalf of all authors of the Work (as defined in the below author licence), an exclusive licence and/or a non-exclusive licence for contributions from authors who are: i) UK Crown employees; ii) where BMJ has agreed a CC-BY licence shall apply, and/or iii) in accordance with the terms applicable for US Federal Government officers or employees acting as part of their official duties; on a worldwide, perpetual, irrevocable, royalty-free basis to BMJ Publishing Group Ltd ("BMJ") its licensees and where the relevant Journal is co-owned by BMJ to the co-owners of the Journal, to publish the Work in this journal and any other BMJ products and to exploit all rights, as set out in our [licence](#).

The Submitting Author accepts and understands that any supply made under these terms is made by BMJ to the Submitting Author unless you are acting as an employee on behalf of your employer or a postgraduate student of an affiliated institution which is paying any applicable article publishing charge ("APC") for Open Access articles. Where the Submitting Author wishes to make the Work available on an Open Access basis (and intends to pay the relevant APC), the terms of reuse of such Open Access shall be governed by a Creative Commons licence – details of these licences and which [Creative Commons](#) licence will apply to this Work are set out in our licence referred to above.

Other than as permitted in any relevant BMJ Author's Self Archiving Policies, I confirm this Work has not been accepted for publication elsewhere, is not being considered for publication elsewhere and does not duplicate material already published. I confirm all authors consent to publication of this Work and authorise the granting of this licence.

1  
2  
3 1 Title Page

4  
5 2 **Scientific title:**

6  
7 3 **Distress and resilience of healthcare professionals during the COVID-19 pandemic (DARVID):**  
8  
9 4 **study protocol for a mixed-methods research project**

10  
11 5  
12 6 **Acronym:** DARVID: **D**istress and **R**esilience of Healthcare Professionals during the **COVID-19**  
13  
14 7 Pandemic

15  
16 8  
17 9 **Authors:** Alexander Fuchs<sup>1\*</sup>, Sandra Abegglen<sup>2</sup>, Joana Berger-Estilita<sup>1</sup>, Robert Greif<sup>1,3</sup>, Helen  
18  
19 10 Eigenmann<sup>2</sup>

20  
21 11  
22 12 <sup>1</sup> Department of Anaesthesiology and Pain Medicine, Inselspital, Bern University Hospital, University  
23  
24 13 of Bern, Bern, Switzerland

25  
26 14 <sup>2</sup> Department of Health Psychology and Behavioural Medicine, Institute of Psychology, University of  
27  
28 15 Bern, Bern, Switzerland

29  
30 16 <sup>3</sup> School of Medicine, Sigmund Freud University Vienna, Vienna, Austria

31  
32 17 \*Corresponding author: Alexander Fuchs, Department of Anaesthesia and Pain Medicine, Bern  
33  
34 18 University Hospital and University of Bern, Freiburgstrasse 10, 3010 Bern, Switzerland, Tel: +41 (0)  
35  
36 19 31 632 24 83, Email: [alexander.fuchs@insel.ch](mailto:alexander.fuchs@insel.ch)

37  
38 20  
39 21 Word count, Abstract: 280/300

40  
41 22  
42 23 Word count text: 3334/4000

43  
44 24  
45  
46  
47  
48  
49  
50  
51  
52  
53  
54  
55  
56  
57  
58  
59  
60

1  
2  
3 **25 Abstract**  
4

5 **26**  
6  
7 **27 Introduction** The unprecedented COVID-19 pandemic has exposed healthcare professionals to  
8  
9 **28** exceptional situations that can lead to increased anxiety (i.e., infection anxiety, perceived  
10  
11 **29** vulnerability), traumatic stress and depression. We will investigate the development of these  
12  
13 **30** psychological disturbances in healthcare professionals at the treatment front line and second line  
14  
15 **31** during the COVID-19 pandemic over a 12-month period in different countries. Additionally, we will  
16  
17 **32** explore whether personal resilience factors and a work-related sense of coherence influence the  
18  
19 **33** development of mental health problems of healthcare professionals.

20 **34 Methods and analysis** We plan to carry out a sequential qualitative–quantitative mixed-methods-  
21  
22 **35** design study. The quantitative phase consists of a longitudinal online survey based on six validated  
23  
24 **36** questionnaires, to be completed at three points in time. A qualitative analysis will follow at the end of  
25  
26 **37** the pandemic, to comprise at least nine semi-structured interviews. The *a-priori* sample size for the  
27  
28 **38** survey will be a minimum of 160 participants, which we will extend to 400, to compensate for drop-  
29  
30 **39** out. Recruitment into the study will be through personal invitations and the ‘snowballing’ sampling  
31  
32 **40** technique. Hierarchical linear regression combined with qualitative data analysis will facilitate greater  
33  
34 **41** understanding of any associations between resilience and mental health issues in healthcare  
35  
36 **42** professionals during pandemics.

37 **43 Ethics and dissemination** The study participants will provide their electronic informed consent. All  
38  
39 **44** recorded data will be stored on a secured research server at the study site, which will only be  
40  
41 **45** accessible to the investigators. The Bern Cantonal Ethics Committee has waived the need for ethical  
42  
43 **46** approval (Req-2020-00355; 1 April, 2020). There are no ethical, legal or security issues regarding the  
44  
45 **47** data collection, processing, storage and dissemination in this project.

46  
47 **48** Trial registration: ISRCTN13694948 (date of registration: 1 April, 2020)  
48  
49 **49**  
50  
51 **50**

52  
53 **51 Keywords:** COVID-19, healthcare professionals, anxiety, resilience, distress, work-related sense of  
54  
55 **52** coherence, mental health, depression, trauma, front-liners; perceived vulnerability to disease  
56  
57 **53**  
58  
59  
60

## 54 **Strengths and limitations of this study**

- 55 • The mixed-methods design with quantitative and qualitative phases that include several validated  
56 instruments and the matched follow-up and semi-structured interviews will provide substantial  
57 insight in the state and development of psychological health and the thoughts of healthcare  
58 professionals during infectious pandemics in several countries;
- 59 • The sophisticated statistical analysis will include a clustered hierarchical data structure and any  
60 imbalanced data, by allowing residual components at each level in the hierarchy;
- 61 • Interdisciplinary and interprofessional cooperation between physicians and health psychologists  
62 will combine different research approaches, and will therefore yield more holistic data by bridging  
63 disciplinary gaps;
- 64 • The participating healthcare professionals might not be representative of the entire population and  
65 for all countries;
- 66 • The survey will be accessible in English, to target a broad participation of international HCPs. This  
67 may limit participation and compliance of HCPs in regions where English is not common and  
68 introduce biases due to underrepresentation or misunderstandings.

## 69 Introduction

70

71 In December 2019, a new Coronavirus known as severe acute respiratory syndrome Coronavirus 2  
72 (SARS CoV-2) appeared for the first time in Wuhan (China). SARS CoV-2 causes corona virus  
73 disease 2019 (COVID-19) which can lead to severe hypoxaemic pneumonia and other serious  
74 complications. Despite containment measures, the virus spread exponentially. The first case outside  
75 China was reported on the 13 January, 2020, in Thailand, which was connected to travel to Wuhan.<sup>1</sup>  
76 On 11 March, 2020, the World Health Organisation defined the COVID-19 outbreak as a pandemic.<sup>2</sup>  
77 In Europe, an Italian cluster developed exponentially, with the first deaths reported on 23 February,  
78 2020.<sup>3</sup> It was soon clear that the health system in northern Italy could not cope with the large numbers  
79 of new patients with respiratory failure who required invasive ventilation support.<sup>4</sup> The COVID-19  
80 pandemic put healthcare professionals (HCPs) in an unprecedented situation. The long working  
81 hours, the need for 'hard triage'<sup>5 6</sup> for ventilation support, and the tight restrictions on daily life  
82 implemented by the government had serious effects on both healthcare workers and the general  
83 population.<sup>7</sup>

84 Infectious diseases arise frequently, and nearly every year. However, these seldom challenge  
85 healthcare systems (e.g., limited capacity of hospital beds, understaffing of personnel) in the way  
86 seen for the COVID-19 pandemic. Therefore, data on the impact of such pandemics on HCPs are still  
87 not available.

88 A recent study from China showed a high prevalence of mental-health symptoms among all  
89 HCPs, including depression, insomnia, anxiety or trauma-stress disorder<sup>8</sup>, similar to those  
90 experienced by military personnel after participation in war scenarios.<sup>9</sup> Front-line HCPs who are  
91 involved in diagnosis, treatment and care of COVID-19 patients<sup>8</sup> are at particular risk of developing  
92 psychological distress and other mental-health symptoms.<sup>8 10</sup> HCPs are expected to be under the  
93 highest perceived threat of COVID-19, and if they believe that their infection with COVID-19 is likely  
94 (i.e., perceived vulnerability), this might have serious consequences on their own health. Additionally,  
95 concerns about the spread of the virus to their family members or friends, their need for self-isolation,  
96 their feelings of not having enough support, and their exposure to the catastrophic news in the media  
97 are believed to have a role in the development of such symptoms.<sup>8-11</sup> These negative stress outcomes  
98 can impact not only on the wellbeing of HCPs, but also on their ability to care effectively for others.<sup>12 13</sup>

1  
2  
3 99 At the other end of the spectrum, people who have to endure significant challenges might  
4  
5 100 experience a degree of post-traumatic growth<sup>14</sup>, which is a term used to describe the strengthening of  
6  
7 101 psychological resilience and values after exposure to particularly demanding situations.<sup>15</sup> Although  
8  
9 102 there is as yet no universal definition, psychological resilience is generally considered to be  
10  
11 103 multidimensional, and to consist of behaviours, thoughts and actions. In short, resilience refers to  
12  
13 104 positive adaptation despite adversity.<sup>16 17</sup> Adopting resilience-enhancing strategies might therefore  
14  
15 105 improve the day-to-day performance of HCPs at work.<sup>18</sup>

16 106 Personal resilience is also related to a sense of ‘coherence’.<sup>18 19</sup> A sense of coherence is  
17  
18 107 defined as a disposition to perceive life circumstances as manageable, comprehensible and  
19  
20 108 meaningful. This might influence a person’s resilience, by making them more adaptable in dealing  
21  
22 109 with distress and adverse events.<sup>18-21</sup> People with a strong sense of coherence are less prone to  
23  
24 110 *burn-out*, and are generally healthier.<sup>13 22-25</sup>

26 111 Due to the increasing prevalence of emerging infectious diseases (e.g., SARS CoV-1, Middle  
27  
28 112 East respiratory syndrome [MERS] CoV) and other worldwide catastrophic events, the capacity to  
29  
30 113 adapt is important, as it allows HCPs to act effectively and to stay healthy in potentially life-  
31  
32 114 threatening situations.<sup>18</sup> More information about associations between resilience factors and a work-  
33  
34 115 related sense of coherence of HCPs in such situations will help to counsel and support HCPs who are  
35  
36 116 facing the consequences of ‘COVID-19 anxiety’, perceived vulnerability, hopelessness, depression  
37  
38 117 and traumatic-stress symptoms.

39 118 This project is designed to primarily determine the degree of COVID-19 anxiety, perceived  
40  
41 119 vulnerability, depression and traumatic-stress symptoms and their variation in HCPs for specific time  
42  
43 120 periods and regions around the world. Additionally, the aim is to explore differences in COVID-19  
44  
45 121 anxiety, perceived vulnerability, depression and traumatic-stress symptoms between front-line (HCPs  
46  
47 122 directly treating COVID-19 patients) and second-line (HCPs not involved in direct care of COVID-19  
48  
49 123 patients) HCPs. A third aim is to determine whether there are any associations between these factors  
50  
51 124 and individual resilience and a work-related sense of coherence across the different phases of the  
52  
53 125 COVID-19 pandemic.

54  
55 126 Therefore, the research questions of this study are:

- 56  
57 127
- Do COVID-19 anxiety and perceived vulnerability differ over time between different countries?
- 58  
59  
60

- 1  
2  
3 128 • Do COVID-19 anxiety and perceived vulnerability differ over time between first-line and second-  
4  
5 129 line HCPs?  
6  
7 130 • How do individual resilience and a work-related sense of coherence influence the development  
8  
9 131 of COVID-19 anxiety, perceived vulnerability, depression and traumatic-stress symptoms  
10  
11 132 during the different phases of a pandemic outbreak?  
12  
13 133 • How do individual resilience and a work-related sense of coherence influence the development  
14  
15 134 of COVID-19 anxiety, perceived vulnerability, depression and traumatic-stress symptoms of  
16  
17 135 front-line HCPs?  
18  
19 136 • What factors contribute to or alleviate COVID-19 anxiety and perceived vulnerability over the  
20  
21 137 study period for first-line HCPs?  
22  
23 138 • Which components of individual resilience and a work-related sense of coherence influence the  
24  
25 139 development of COVID-19 anxiety, perceived vulnerability, depression and traumatic-stress  
26  
27 140 symptoms during the study phases for front-line HCPs?  
28  
29 141

## 30 142 **Methods and analysis**

### 31 143 32 143 33 34 144 ***Study design overview***

35  
36 145 We will conduct a sequential mixed-methods study based on an explanatory design<sup>26</sup>. The first  
37  
38 146 quantitative phase will explore the association of individual resilience, a work-related sense of  
39  
40 147 coherence and the development of mental-health symptoms during the COVID-19 pandemic, and  
41  
42 148 their variations over time, between countries and between front-line and second-line HCPs. The  
43  
44 149 qualitative phase, collected and analysed after the quantitative phase, will consist of semi-structured  
45  
46 150 interviews, and will elaborate on the development of mental health symptoms, use of coping  
47  
48 151 strategies, and personal resilience factors during the COVID-19 pandemic in front-line HCPs. The  
49  
50 152 combination of these two methodological approaches will allow triangulation and provide a more  
51  
52 153 granular understanding of the processes involved in any associations with anxiety, perceived  
53  
54 154 vulnerability, depression, traumatic-stress symptoms and resilience factors over the course of the  
55  
56 155 current COVID-19 pandemic. The quantitative data and their subsequent analysis will provide a  
57  
58 156 general understanding of the development of mental health symptoms during the pandemic, while the  
59  
60 157 qualitative data and their analysis will refine and explain the statistical findings in more depth, by

1  
2  
3 158 exploring participants' views, thoughts and feelings<sup>27-29</sup>. Data collection will be sequential (first  
4  
5 159 quantitative and then qualitative) but both study parts will be given equal priority.  
6  
7 160

8  
9 161 ***Quantitative phase: longitudinal online survey***

10 162

11  
12  
13 163 *Data collection*

14 164 An online survey was launched on the 2 April, 2020, in English. This will collect data for 2 weeks. The  
15  
16 165 follow-ups are planned for July and October 2020, over another 2-week period. Depending on the  
17  
18 166 results of the follow-ups, a third might be added in late 2020.

19  
20 167 The longitudinal internet-based survey is a 64-item questionnaire (Supplemental Digital  
21  
22 168 Content 1) based on six pre-existing validated self-reporting questionnaires and demographic data.  
23  
24 169 This questionnaire is hosted online at Qualtrics (Provo, Utah, USA), which restricts access to one  
25  
26 170 response per device.

27  
28 171 The survey link will be primarily distributed through social media (LinkedIn, Facebook, Twitter,  
29  
30 172 WhatsApp, Threema), using the 'snowballing' sampling technique.<sup>30-32</sup> Later, personal contacts via e-  
31  
32 173 mail invitations from all of the authors will invite further study participants, with supporting  
33  
34 174 (inter)national societies e-mailing the link via their own mailing lists, to better distribute the survey.  
35  
36 175 Contact persons are asked to further distribute the survey, to promote the greatest number of  
37  
38 176 responses as possible over the entire study period.

39  
40 177 To minimize the possibility of attrition bias we ensure a good communication between study  
41  
42 178 coordinators and participants, send several personalized follow-up invitations, and apply  
43  
44 179 oversampling technique<sup>33</sup>. Moreover, we contacted several healthcare professional associations and  
45  
46 180 societies in different countries to ensure an HCP-oriented distribution of the survey and to minimize  
47  
48 181 sample selectivity bias. We undertook a short pilot testing with the co-authors and some of the  
49  
50 182 authors' colleagues.

51 183

52  
53 184 *Participant inclusion and exclusion criteria*

54  
55 185 We will include HCPs over 18 years of age who agree to participate. A HCP is defined as a  
56  
57 186 postgraduate person listed in the sub-major group 22 (Health Professionals), according to the  
58  
59 187 International Standard Classification of Occupations, with exclusion of minor group 225  
60



1  
2  
3 188 (Veterinarians)<sup>34</sup>. This includes medical doctors, nursing and midwifery professionals, traditional and  
4  
5 189 complementary medicine professionals, paramedical practitioners, dentists, pharmacists and  
6  
7 190 environmental and occupational health and hygiene professionals. All participants who do not comply  
8  
9 191 with these criteria will be excluded.

10  
11 19212  
13 193 *Measurements*14  
15 194 The primary outcome of this study is the variation in COVID-19 anxiety in different regions, over three  
16  
17 195 time periods, measured using a modified version of the Swine Flu Anxiety Items [SFI])<sup>35</sup> a 10-item  
18  
19 196 survey developed to measure anxiety disorders and somatization (Cronbach's alpha = 0.85).20  
21 197 The secondary outcomes will include:

- 22
- 
- 23 198 • the Perceived Vulnerability to Disease (PVD) questionnaire score,
- <sup>36</sup>
- a 15-item tool used to
- 
- 24
- 
- 25 199 measure subjective vulnerability to disease (Cronbach's alpha = 0.82);
- 
- 26
- 
- 27 200 • the Patient Health Questionnaire (PHQ-9) score,
- <sup>37</sup>
- a 9-item tool developed for depression
- 
- 28
- 
- 29 201 evaluation (Cronbach's alpha = 0.89);
- 
- 30
- 
- 31 202 • the Impact of Event Scale-6 (IES-6) score,
- <sup>38</sup>
- a 6-items tool for evaluation of symptoms of post-
- 
- 32
- 
- 33 203 traumatic stress reactions (Cronbach's alpha = 0.80);
- 
- 34
- 
- 35 204 • the Connor-Davidson Resilience Scale (CD-RISC 10) score,
- <sup>39</sup>
- a 10-item tool, as a short version
- 
- 36
- 
- 37 205 of the CD-RISC 25,
- <sup>40</sup>
- to evaluate individual resilience (Cronbach's alpha = 0.85);
- 
- 38
- 
- 39 206 • the Work-Sense of Coherence Scale (Work-SoC) score,
- <sup>41</sup>
- a 9-item tool to evaluate the
- 
- 40
- 
- 41 207 perceived comprehensibility, manageability and meaningfulness of an individual's current work
- 
- 42
- 
- 43 208 situation (Cronbach's alpha = 0.83);
- 
- 44
- 
- 45 209 • a globally measured current risk perception for becoming infected while working, as assessed
- 
- 46
- 
- 47 210 by a self-created item "I am afraid I will become infected with COVID-19 while on the job"
- 
- 48
- 
- 49 211 (measured on a visual analogue scale from 0-10);
- 
- 50
- 
- 51 212 • a globally measured current perception of the stress at work, as a second self-created item
- 
- 52
- 
- 53 213 "How stressful is your current work situation for you?" (measured on a visual analogue scale
- 
- 54
- 
- 55 214 from 0-10);
- 
- 56
- 
- 57 215 • socio-demographic variables, and work-related and COVID-19-related characteristics: country
- 
- 58
- 
- 59 216 and city of current occupation, age, sex, profession, main working place, years working in the
- 
- 60
- 
- 217 healthcare system, belonging to a risk population, sharing a household with other people, being

218 in a relationship, having children, being pregnant or living with a pregnant woman, private close  
219 contact with people belonging to the risk population, having had direct contact with COVID-19–  
220 infected patients, being infected with COVID-19, having been positively tested for COVID-19  
221 antibodies.

222

### 223 *Sample size calculation*

224 The required sample size was calculated using an *a-priori* power analysis with G\*Power 3.1.<sup>42</sup>

225 Assuming a small effect size ( $f^2 = .15$ ) for a repeated measure ANOVA with three time points and

226 within-between interaction ( $\alpha = .05$ ,  $1-\beta = .95$ ), the minimum required sample size for four language

227 groups was  $n = 160$ . To compensate for drop-out over the three measurement times, we will aim for

228 400 responders.

229

### 230 *Statistical analysis plan*

231 To accommodate between- and within-effects in light of possibly unequal numbers of observations,

232 hierarchical linear mixed models will be fit to the longitudinal measures of the primary and secondary

233 outcome variables.<sup>43</sup> Hierarchical linear regression accounts for non-independence of observations

234 and attrition inherent in longitudinal data.<sup>43</sup> The analyses will be conducted using the R-package:

235 nlme<sup>44</sup> in R Statistical Language,<sup>45</sup> using full maximum likelihood estimations. The normal distributions

236 of the outcome variables will be examined by residual diagnostics of the fitted multilevel models.

237 For each primary and secondary outcome variable, the analysis will proceed according to

238 different steps<sup>43</sup>. First, a null model (intercept only model) will be estimated, which allows an

239 estimation of the proportion of variation in the outcome variables; i.e., between and within the persons

240 in the sample. The first model (unconditional growth model with random intercept) will examine the

241 within-persons trajectories of change across measurement points. The second model (conditional

242 growth model with random intercept and cross-level interaction) will examine the effects of country/

243 front-line and second-line HCPs across the different times (i.e., the pandemic phase).

244 To address the research questions that are focussed on the relationships between the

245 different outcome variables and the resilience and work-related sense of coherence, structural

246 equation modelling will be performed<sup>46</sup>. These analyses will be carried out using the R-package:

247 lavaan<sup>47</sup> in the R Statistical Language,<sup>45</sup> using full maximum likelihood estimation.

1  
2  
3 248 Statistical strategies for dealing with threats to internal validity (i.e. attrition bias, sample  
4  
5 249 selectivity bias, multiple-testing bias) include extensive drop-out analyses<sup>33</sup>, reporting of attrition by  
6  
7 250 socioeconomic factors<sup>33</sup>, statistical comparison of participants key characteristics with population  
8  
9 251 characteristics, and applying of linear hierarchical regression analyses, which include all available  
10  
11 252 data<sup>41</sup> and compensate for multiple testing<sup>48</sup>.

12 253

14 254 ***Qualitative phase: semi-structured interviews***

16 255

18 256 ***Data collection***

20 257 After completion of the online survey, the participants will be invited to participate in the semi-  
21  
22 258 structured interviews. We will select all of the participants for the qualitative phase according to  
23  
24 259 availability and region. We will select them from the pool used in the quantitative phase, so as to best  
25  
26 260 represent their experience and views. As the study is sequential in nature, it is impossible to pre-  
27  
28 261 emptively select participants for the qualitative phase. Therefore, we will perform stratified purposive  
29  
30 262 sampling into homogeneous focus groups, stratified by front- or second-liners, profession and country  
31  
32 263 of origin, to enable comparisons<sup>49 50</sup>. We aim to perform at least nine semi-structured interview  
33  
34 264 groups. All interviews will be coded in a phased fashion, with interim analysis to check for saturation  
35  
36 265 (i.e., when additional data do not lead to any new themes). If saturation is not reached, three more  
37  
38 266 interviews will be performed. Sixty-minute semi-structured interviews will be conducted after the  
39  
40 267 quantitative phase is finished, in different locations in Europe. The aim is to explore participants' views  
41  
42 268 on the influence of resilience and a work-related sense of coherence on the development of anxiety,  
43  
44 269 depression and trauma-stress disorder during the pandemic outbreak. We used the protocol proposed  
45  
46 270 by Castillo-Montoya<sup>51</sup> to develop a semi-structured interview guide (Supplemental Digital Content 2).  
47  
48 271 We first ensured that interview questions were aligned with our research questions, we then  
49  
50 272 constructed an inquiry-based conversation, we asked for external feedback on interview protocols and  
51  
52 273 we will pilot the interview guide in the near future. The interview data will consist of the audio and  
53  
54 274 video recordings, which will be further transcribed by two members of the study team.

55 275 Strategies for dealing with threats to validity of the qualitative data used in this study include  
56  
57 276 method triangulation, member-checking (also known as participant validation)<sup>52</sup>, peer support and an

1  
2  
3 277 audit trail. The use of triangulation of different data sources will enhance objectivity and strengthen  
4  
5 278 intersubjective agreement<sup>53</sup>. A thorough methodologic description will also help credibility.

6  
7 279

8  
9 280 *Analysis plan*

10 281 All of the data will be processed with the software MaxQDA2020 (Verbi, Berlin, Germany). Data  
11  
12 282 originating from the semi-structured interviews will be processed according to the Miles and  
13  
14 283 Huberman<sup>54</sup> framework for data analysis. This initially includes data reduction – including segmenting,  
15  
16 284 editing and summarising the data – followed by data display, and finally conclusions verification. Two  
17  
18 285 investigators will code the first group interviews independently and will agree on the coding scheme  
19  
20 286 for the remaining interviews. Respondent validation and paired coding will be performed as a way to  
21  
22 287 increase quality. Memoing will be performed parallel to coding.

23  
24 288

25  
26 289 *Trial status*

27  
28 290 The trial started to recruit participants for the first round of the survey (quantitative data) on 2 April,  
29  
30 291 2020, for a period of 2 weeks. The next rounds are planned for July and October 2020. After the  
31  
32 292 quantitative data collection ends, we will move on to the qualitative phase.

33  
34 293

35  
36 294 *Ethics and Dissemination*

37 295 The Bern Cantonal Ethics Committee waived the need for ethical approval on 1 April, 2020, according  
38  
39 296 to the Swiss Act for Human Research (BASEC Nr. 2020-00355, Prof. Dr. med Christian Seiler,  
40  
41 297 Murtenstrasse 31, 3010 Bern, Switzerland, Tel: +41-31-6337070, [info.kek.kapa@gef.be.ch](mailto:info.kek.kapa@gef.be.ch)). All  
42  
43 298 procedures for this investigation will follow the Helsinki Declaration.<sup>55</sup>

44  
45 299 All of the participants will be sent a link to the survey, with a detailed cover letter that explains  
46  
47 300 the entire project, the purpose of the project, the context of the research, and the contacts of the lead  
48  
49 301 investigator (available at [https://psyunibe.qualtrics.com/jfe/form/SV\\_3WYgbkLWqiDPDG5](https://psyunibe.qualtrics.com/jfe/form/SV_3WYgbkLWqiDPDG5)). Electronic  
50  
51 302 informed consent to participate will be obtained from all of the participants at the beginning of the  
52  
53 303 survey. Should any participants decide not to participate in the study, their decision will not affect  
54  
55 304 them in any way. No incentives will be offered or given. Participants will be asked for their e-mail, to  
56  
57 305 enable contact with them during the follow-up and qualitative phases of the study, and for pairing

1  
2  
3 306 purposes. During the interviews, participants' faces will not be included in the video recordings, and  
4  
5 307 their performances will not be shared with any external subjects.

6  
7 308 All of the researchers involved will comply with the Data Protection Act and the Swiss Law for  
8  
9 309 Human Research. There are no ethical, legal or security issues regarding the data collection,  
10  
11 310 processing, storage and dissemination for this project. We will neither obtain nor generate sensitive  
12  
13 311 data, and we do not sign any confidentiality agreement. All data will be stored for up to 10 years after  
14  
15 312 the project, according to the Swiss Law for Human Research.

16  
17 313 This study has been registered at the UK based International Standard Randomised  
18  
19 314 Controlled Trial Number (ISRCTN) under the registration number: ISRCTN13694948. All relevant  
20  
21 315 data generated or used by the research project (i.e., raw data, all processed data that directly  
22  
23 316 underlies the reported results, and all ancillary information necessary to understand, evaluate,  
24  
25 317 interpret and re-use the results of the study) will be stored on the official server of the Institute of  
26  
27 318 Psychology, Department of Health Psychology and Behavioural Medicine at the University of Bern. All  
28  
29 319 of the data are, and will be, password protected and only accessible by SA and HE. The datasets will  
30  
31 320 be flagged for long-term storage. Datasets flagged for long-term storage are subjected to specific  
32  
33 321 measures to preserve data integrity and data safety, such as additional back-ups, regular re-writes to  
34  
35 322 new storage media, and redundant storage in third-party repositories.

36  
37 323 The datasets generated and analysed during the current study will be available from the  
38  
39 324 primary investigator upon reasonable request from university-based research groups with suitable  
40  
41 325 and answerable research questions. The primary investigator will be responsible for ensuring that  
42  
43 326 electronic file permissions are correctly assigned and for advising on other aspects of data storage  
44  
45 327 and security. Both qualitative and quantitative data are expected to be available from March 2021. We  
46  
47 328 expect no limitations with respect to publishing the data.

48  
49 329 The study results will be published in a peer-reviewed international medical journal after the  
50  
51 330 first trimester of 2021. A full timeline of the project is shown in Figure 1.

52  
53 331

### 53 332 **Public involvement statement**

54  
55 333 This research will be carried out without patient involvement, as patients are not the study subjects.  
56  
57 334 We have involved the Swiss Association of Assistants and Registrars (VSAO), the Swiss Society of  
58  
59 335 Anaesthesiology and Reanimation (SGAR) and the European Airway Management Society (EAMS) to  
60

1  
2  
3 336 comment on the study design, and have consulted HCPs on relevant outcomes. After the data  
4  
5 337 analysis, we will invite them to interpret the results again. We have not had time to invite persons  
6  
7 338 outside the study group to contribute to the writing or editing of this document, because of the velocity  
8  
9 339 of the progression of the COVID-19 pandemic.

10 340

11 341 ***Importance of the study***

12 342 Despite the large body of literature that is focussed on the prevalence of mental health symptoms  
13  
14 343 after catastrophes or natural disasters, the investigation of the resilience of HCPs is scarce,  
15  
16 344 particularly in the face of a surge capacity. In disaster situations, the prevalence of resilience appears  
17  
18 345 to depend on adequate preparedness, good social support and proactive coping styles<sup>9</sup>. However,  
19  
20 346 most disaster sites do not impose social distancing and self-isolation procedures, which might further  
21  
22 347 compromise the HCP ability to cope. It has been shown before that professionals involved in disaster  
23  
24 348 relief work can develop post-traumatic growth<sup>14 15</sup>. Establishing a clear relationship between resilience  
25  
26 349 and a work-related sense of coherence with the development of mental symptoms during exceptional  
27  
28 350 situations like the current COVID-19 pandemic might help to identify HCPs who are both particularly  
29  
30 351 protected and at risk, which will allow the adequate distribution of psychological interventions.  
31  
32 352 Organisations can also potentiate resilience in their employees by ensuring that they are adequately  
33  
34 353 trained. This is would be an affordable measure that can save money and resources by keeping the  
35  
36 354 staff at work and avoiding sick leave.

37 355

**References**

1. Organization WH. Novel Coronavirus (2019-nCoV) - Situation Report 1. Jan 12, 2020: World Health Organization, 2020.
2. Organization WH. Coronavirus disease 2019 (COVID-19) Situation Report – 51. Mar 11, 2020: World Health Organization, 2020.
3. Organization WH. Novel Coronavirus (2019-nCoV) - Situation Report 34. Feb 23, 2020: World Health Organization, 2020.
4. Remuzzi A, Remuzzi G. COVID-19 and Italy: what next? *Lancet* 2020 doi: 10.1016/S0140-6736(20)30627-9
5. Italian Society of Anesthesia A, Resuscitation and Intensive Care (SIAARTI). Clinical Ethics Recommendations for the allocation of intensive care treatment, in exceptional, resource-limited circumstances: I; 2020 [updated March, 16th - 2020. Available from: <http://www.siaarti.it/SiteAssets/News/COVID19%20-%20documenti%20SIAARTI/SIAARTI%20-%20Covid-19%20-%20Clinical%20Ethics%20Reccomendations.pdf> accessed Apr 02,2020.
6. Bouadma L, Lescure FX, Lucet JC, et al. Severe SARS-CoV-2 infections: practical considerations and management strategy for intensivists. *Intensive Care Med* 2020;46(4):579-82. doi: 10.1007/s00134-020-05967-x
7. Robertson E, Hershenfield K, Grace SL, et al. The psychosocial effects of being quarantined following exposure to SARS: a qualitative study of Toronto health care workers. *Can J Psychiatry* 2004;49(6):403-7. doi: 10.1177/070674370404900612
8. Lai J, Ma S, Wang Y, et al. Factors Associated With Mental Health Outcomes Among Health Care Workers Exposed to Coronavirus Disease 2019. *JAMA Netw Open* 2020;3(3):e203976. doi: 10.1001/jamanetworkopen.2020.3976
9. Kelly FE, Osborn M, Stacey MS. Improving resilience in anaesthesia and intensive care medicine - learning lessons from the military. *Anaesthesia* 2019 doi: 10.1111/anae.14911
10. Lee AM, Wong JG, McAlonan GM, et al. Stress and psychological distress among SARS survivors 1 year after the outbreak. *Can J Psychiatry* 2007;52(4):233-40. doi: 10.1177/070674370705200405
11. Wong TW, Yau JK, Chan CL, et al. The psychological impact of severe acute respiratory syndrome outbreak on healthcare workers in emergency departments and how they cope. *Eur J Emerg Med* 2005;12(1):13-8. doi: 10.1097/00063110-200502000-00005

- 1  
2  
3 388 12. Barnett JE, Baker EK, Elman NS, et al. In pursuit of wellness: The self-care imperative. *Prof*  
4 389 *Psychol: Res Prac* 2007;38(6):603a.
- 6  
7 390 13. Van der Colff JJ, Rothmann S. Occupational stress, sense of coherence, coping, burnout and  
8 391 work engagement of registered nurses in South Africa. *SA J Ind Psychol* 2009;35(1):1-10.
- 10  
11 392 14. Brooks S, Amlot R, Rubin GJ, et al. Psychological resilience and post-traumatic growth in  
12 393 disaster-exposed organisations: overview of the literature. *BMJ Mil Health* 2020;166(1):52-56.  
13 394 doi: 10.1136/jramc-2017-000876
- 15  
16 395 15. Greenberg N, Docherty M, Gnanapragasam S, et al. Managing mental health challenges faced by  
17 396 healthcare workers during covid-19 pandemic. *BMJ* 2020;368:m1211. doi:  
18 397 10.1136/bmj.m1211
- 20  
21 398 16. Luthar S. Resilience in development: A synthesis of research across five decades. In: Cicchetti D,  
22 399 Cohen DJ, eds. *Developmental psychopathology: Risk, disorder, and adaptation*. 2nd. ed.  
23 400 New York: John Wiley & Sons Inc. 2006: 739–95.
- 25  
26 401 17. Manyena SB. The concept of resilience revisited. *Disasters* 2006;30(4):434-50.
- 28  
29 402 18. Streb M, Haller P, Michael T. PTSD in paramedics: resilience and sense of coherence. *Behav*  
30 403 *Cogn Psychother* 2014;42(4):452-63. doi: 10.1017/S1352465813000337
- 32  
33 404 19. Eriksson M, Lindstrom B. Antonovsky's sense of coherence scale and the relation with health: a  
34 405 systematic review. *J Epidemiol Community Health* 2006;60(5):376-81. doi:  
35 406 10.1136/jech.2005.041616
- 37  
38 407 20. Antonovsky A. *Unraveling the mystery of health: How people manage stress and stay well*:  
39 408 Jossey-bass 1987.
- 41  
42 409 21. Antonovsky H, Sagy S. The development of a sense of coherence and its impact on responses to  
43 410 stress situations. *J Soc Psychol* 1986;126(2):213-26.
- 45  
46 411 22. Gilbar O. Relationship between burnout and sense of coherence in health social workers. *Soc*  
47 412 *Work Health Care* 1998;26(3):39-49. doi: 10.1300/J010v26n03\_03
- 49  
50 413 23. Levert T, Lucas M, Ortlepp K. Burnout in psychiatric nurses: Contributions of the work  
51 414 environment and a sense of coherence. *SA J Psychol* 2000;30(2):36-43.
- 53  
54 415 24. Tselebis A, Moulou A, Ilias I. Burnout versus depression and sense of coherence: study of Greek  
55 416 nursing staff. *Nurs Health Sci* 2001;3(2):69-71. doi: 10.1046/j.1442-2018.2001.00074.x
- 57  
58 417 25. Pahkin K, Väänänen A, Koskinen A, et al. Organizational change and employees' mental health:  
59 418 the protective role of sense of coherence. *J Occupat Environ Med* 2011;53(2):118-23.
- 60



- 1  
2  
3 419 26. Schifferdecker KE, Reed VA. Using mixed methods research in medical education: basic  
4 420 guidelines for researchers. *Med Educ* 2009;43(7):637–44. doi: 10.1111/j.1365-  
5 421 2923.2009.03386.x  
6  
7  
8 422 27. Rossman GB, Wilson BL. Numbers and words: Combining quantitative and qualitative methods in  
9 423 a single large-scale evaluation study. *Eval Rev* 1985;9(5):627-43.  
10  
11  
12 424 28. Tashakkori A, Teddlie C, Teddlie CB. Mixed methodology: Combining qualitative and quantitative  
13 425 approaches: Sage 1998.  
14  
15  
16 426 29. Creswell J. Research Design: Qualitative, Quantitative and Mixed Methods Approaches. 4 ed.  
17 427 Thousand Oaks, CA.: SAGE 2014.  
18  
19  
20 428 30. Baltar F, Brunet I. Social research 2.0: virtual snowball sampling method using Facebook. *Internet*  
21 429 *Res* 2012;22 (1):57-74.  
22  
23  
24 430 31. Zdravkovic M, Berger-Estilita J, Sorbello M, et al. An international survey about rapid sequence  
25 431 intubation of 10,003 anaesthetists and 16 airway experts. *Anaesthesia* 2020;75(3):313-22.  
26 432 doi: 10.1111/anae.14867  
27  
28  
29 433 32. Zdravkovic M, Osinova D, Brull SJ, et al. Perceptions of gender equity in departmental leadership,  
30 434 research opportunities, and clinical work attitudes: an international survey of 11 781  
31 435 anaesthesiologists. *Br J Anaesth* 2020;124(3):e160-e70. doi: 10.1016/j.bja.2019.12.022  
32  
33  
34 436 33. Hindmarch P, Hawkins A, McColl E, et al. Recruitment and retention strategies and the  
35 437 examination of attrition bias in a randomised controlled trial in children's centres serving  
36 438 families in disadvantaged areas of England. *Trials* 2015;16:79. doi: 10.1186/s13063-015-  
37 439 0578-4  
38  
39  
40  
41 440 34. Ganzeboom HB. International standard classification of occupations ISCO-08 with ISEI-08 scores  
42 441 Geneva: International Labour Office; 2012 [Available from:  
43 442 [www.ilo.org/public/english/bureau/stat/isco/docs/publication08.pdf](http://www.ilo.org/public/english/bureau/stat/isco/docs/publication08.pdf) accessed 20th May 2020.  
44  
45  
46 443 35. Wheaton MG, Abramowitz JS, Berman NC, et al. Psychological predictors of anxiety in response  
47 444 to the H1N1 (swine flu) pandemic. *Cognitive Therap Res* 2012;36(3):210-18.  
48  
49  
50 445 36. Duncan LA, Schaller M, Park JH. Perceived vulnerability to disease: Development and validation  
51 446 of a 15-item self-report instrument. *Pers Individ Differ* 2009;47(6):541-46.  
52  
53  
54 447 37. Kroenke K, Spitzer RL, Williams JB. The PHQ-9: validity of a brief depression severity measure. *J*  
55 448 *Gen Intern Med* 2001;16(9):606-13. doi: 10.1046/j.1525-1497.2001.016009606.x  
56  
57  
58  
59  
60

- 1  
2  
3 449 38. Thoresen S, Tambs K, Hussain A, et al. Brief measure of posttraumatic stress reactions: impact of  
4 450 Event Scale-6. *Soc Psychiatry Psychiatr Epidemiol* 2010;45(3):405-12. doi: 10.1007/s00127-  
5 451 009-0073-x  
6  
7  
8 452 39. Campbell-Sills L, Stein MB. Psychometric analysis and refinement of the Connor-davidson  
9 453 Resilience Scale (CD-RISC): Validation of a 10-item measure of resilience. *J Trauma Stress*  
10 454 2007;20(6):1019-28. doi: 10.1002/jts.20271  
11  
12  
13 455 40. Connor KM, Davidson JR. Development of a new resilience scale: the Connor-Davidson  
14 456 Resilience Scale (CD-RISC). *Depress Anxiety* 2003;18(2):76-82. doi: 10.1002/da.10113  
15  
16  
17 457 41. Vogt K, Jenny GJ, Bauer GF. Comprehensibility, manageability and meaningfulness at work:  
18 458 Construct validity of a scale measuring work-related sense of coherence. *SA J Ind Psychol*  
19 459 2013;39(1):1-8.  
20  
21  
22  
23 460 42. Faul F, Erdfelder E, Lang AG, et al. G\*Power 3: a flexible statistical power analysis program for  
24 461 the social, behavioral, and biomedical sciences. *Behav Res Methods* 2007;39(2):175-91. doi:  
25 462 10.3758/bf03193146  
26  
27  
28 463 43. Singer JD, Willett JB. Applied longitudinal data analysis: Modeling change and event occurrence.  
29 464 Oxford, UK: Oxford University Press 2003.  
30  
31  
32 465 44. Pinheiro J, Bates D, DebRoy S, et al. Linear and nonlinear mixed effects models. *R package*  
33 466 *version* 2007;3:57.  
34  
35  
36 467 45. Team RC. R: A language and environment for statistical computing Vienna, Austria 2013  
37 468 [Available from: <https://www.r-project.org>.  
38  
39  
40 469 46. Kline RB. Principles and practice of structural equation modeling: Guilford publications 2015.  
41  
42 470 47. Rosseel Y. Structural equation modeling with lavaan. *J Stat Softw* 2012;48(2):1-36.  
43  
44  
45 471 48. Gelman A, Hill J, Yajima M. Why we (usually) don't have to worry about multiple comparisons. *J*  
46 472 *Res Educ Eff* 2012;5(2):189-211.  
47  
48  
49 473 49. Teddlie C, Tashakkori A. Foundations of mixed methods research: Integrating quantitative and  
50 474 qualitative approaches in the social and behavioral sciences: Sage 2009.  
51  
52  
53 475 50. Teddlie C, Yu F. Mixed methods sampling: a typology with examples. *J Mixed Methods Res*  
54 476 2007;1:77-100. doi: 10.1177/1558689806292430  
55  
56  
57 477 51. Castillo-Montoya M. Preparing for Interview Research: The Interview Protocol Refinement  
58 478 Framework. *Qual Rep* 2016;21(5)  
59  
60

- 1  
2  
3 479 52. Morse JM. Critical Analysis of Strategies for Determining Rigor in Qualitative Inquiry. *Qual Health*  
4 480 *Res* 2015;25(9):1212–22. doi: 10.1177/1049732315588501  
5  
6  
7 481 53. Robson C, McCartan K. Real world research: a resource for social scientists and practitioner-  
8 482 researchers. 4th ed. Oxford, UK.: Blackwell Publishers 2016.  
9  
10  
11 483 54. Miles MB, Huberman AM, Saldaña J. Qualitative data analysis: A methods sourcebook. 3 ed.  
12 484 Thousand Oaks, California: SAGE 2014.  
13  
14  
15 485 55. World Medical A. World Medical Association Declaration of Helsinki: ethical principles for medical  
16 486 research involving human subjects. *JAMA* 2013;310(20):2191-4. doi:  
17 487 10.1001/jama.2013.281053  
18  
19 488  
20  
21 489  
22  
23  
24  
25  
26  
27  
28  
29  
30  
31  
32  
33  
34  
35  
36  
37  
38  
39  
40  
41  
42  
43  
44  
45  
46  
47  
48  
49  
50  
51  
52  
53  
54  
55  
56  
57  
58  
59  
60

1  
2  
3 490 **Authors' contributions:** This study was conceptualised by RG and AF, but all authors contributed  
4  
5 491 equally to the final methodology. JBE, RG and AF recruited the participants. SA and HE hosted the  
6  
7 492 survey, performed data collection and analysis. All authors significantly contributed to the writing of  
8  
9 493 the manuscript. The manuscript was reviewed and edited prior to submission, and all authors agreed  
10  
11 494 on the final version.

12 495

13 496

16 497 **Funding statement:** This work is supported by an unrestricted grant from the Department of  
17  
18 498 Anaesthesiology and Pain Medicine, Inselspital, Bern University Hospital.

19 499

20 500

24 501 **Competing interest statement:** The authors have no competing interests to declare

25 502

26 503

30 504 **Figure Legend:**

31 505 Figure 1: Project timeline

32 506

33 507

37 508 **Additional Files**

39 509 **Supplemental Digital Content 1** – Online Questionnaire

41 510 **Supplemental Digital Content 2** – DARVID guidance document for the interviews

42 511

1  
2  
3  
4  
5  
6  
7  
8  
9  
10  
11  
12  
13  
14  
15  
16  
17  
18  
19  
20  
21  
22  
23  
24  
25  
26  
27  
28  
29  
30  
31  
32  
33  
34  
35  
36  
37  
38  
39  
40  
41  
42  
43  
44  
45  
46  
47  
48  
49  
50  
51  
52  
53  
54  
55  
56  
57  
58  
59  
60

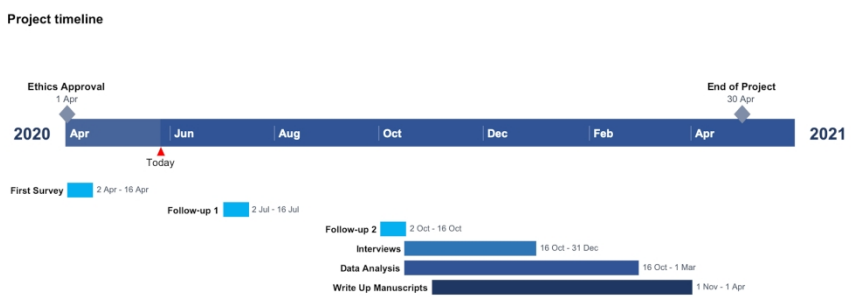

Figure 1: Project timeline  
297x209mm (300 x 300 DPI)

# COVID-19

Start of Block: Block 1

Q23

**Distress and Resilience of Healthcare Professionals during the COVID-19-Pandemic (DARVID): An observational longitudinal questionnaire trial** We invite you to participate in our 9-month study on the association of psychological distress and coping strategies of healthcare professionals during the current COVID-19-pandemic in Europe.

Healthcare professionals who participate in this study will help to gain a better understanding of work-related distress, psychological health and resilience factors in the current pandemic outbreak. These results will serve to develop specific interventions to foster the individual and organizational resilience of medical healthcare providers in the future. This is why your contribution is very important.

When you enter the survey, you will be asked to complete questionnaires. This will take between 10 to 15 minutes.

Most of these questionnaires have already been validated. We could not modify questions, thus some statements might sound strange in the current situation. Please answer as accurately as possible. As per study design, it will not be possible to skip questions. We need to collect all the information.

Your participation in this study is voluntary. If you decide at any time not to participate, it will not affect the care, services or benefits to which you are entitled. Answering these questions has no known risks for you. If you interrupt in the answering process you may return later as your answers are temporarily saved for 7 days after your last activity.

All information taken from the study will be coded for analysis to protect each subject's identity. However, we will need your e-mail for further contact. We expect to repeat the survey in the summer and autumn. No identifying information will be used when discussing or reporting data. The investigators will keep all files and data collected safely at the departmental research server according to the Swiss law on human research. Once all data has been fully analyzed it will be kept for 10 years according to local research law.

The Bern Cantonal Ethics Committee has waived the need for ethical approval.

Prof. Dr. med. Robert Greif, MME, FERC  
University Hospital Bern  
Department of Anaesthesiology and Pain Medicine  
Freiburgstrasse 4  
CH-3010 Bern  
[robert.greif@insel.ch](mailto:robert.greif@insel.ch)

Dr. phil. Sandra Abegglen  
University of Bern  
Department of Health Psychology and Behavioural Medicine

1  
2  
3 Fabrikstrasse 8  
4 CH-3012 Bern  
5 [sandra.abegglen@psy.unibe.ch](mailto:sandra.abegglen@psy.unibe.ch)  
6  
7

---

8  
9 Q23 I have read the foregoing information. I consent voluntarily to participate in this study.

11  
12  Yes (1)

13  
14  No (2)

15  
16  
17  
18 End of Block: Block 1

---

19 Start of Block: Block 13

20  
21  
22 Q28 All information taken from the study will be coded to protect each subject's name. The  
23 study group needs your e-mail to contact you for the summer and fall questionnaires, but never  
24 ever identifying information will be used when discussing or reporting data and results of the  
25 study.  
26  
27

---

28  
29  
30 \*

31  
32  
33 Q29 Your e-mail address  
34  
35  
36  
37

---

38  
39  
40 Q30 The investigators will safely keep password protected all files and data safe at the  
41 departmental research server according to the Swiss law on human research. Once all data  
42 has been fully analyzed it will be kept for 10 years according to local research law.  
43  
44

45 End of Block: Block 13

---

46 Start of Block: Block 2

47  
48  
49 X→

50  
51  
52 Q34 In which country do you currently work?  
53

54 ▼ Afghanistan (1) ... Zimbabwe (1357)  
55  
56  
57  
58  
59  
60

1  
2  
3  
4  
5 Q32 In which city do you currently work?  
6  
7  
8 \_\_\_\_\_  
9

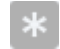

12  
13  
14 Q2 Age in years:  
15  
16  
17 \_\_\_\_\_  
18  
19

20  
21  
22 Q3 Your gender?  
23

- 24  Male (1)  
25  
26  Female (2)  
27  
28  Other (3)  
29  
30

31  
32 **End of Block: Block 2**  
33

34 **Start of Block: Block 12**  
35

36  
37 Q27

38 We need an informed consent from you. Otherwise you cannot participate.  
39  
40

41  
42 Your decision to participate in this study is complete voluntary. If you decide to not participate, it  
43 will not affect the care, services, or benefits to which you are entitled.  
44  
45

46  
47  
48 If you decide to participate in this study, please go back and indicate "yes".  
49  
50

51  
52 **End of Block: Block 12**  
53

54 **Start of Block: Block 3**  
55  
56  
57  
58  
59  
60



1  
2  
3 Q11 What is your profession?  
4

5  Nurse (1)  
6

7  Physician (2)  
8

9  Midwife (3)  
10

11  Pre-hospital Technician (4)  
12

13  Other (what?) (5) \_\_\_\_\_  
14  
15

16  
17  
18 -----  
19  
20  
21 Q33 Your main working place is:  
22

23  ICU (1)  
24

25  Anesthesia/Surgery (2)  
26

27  Emergency room (3)  
28

29  Ward (4)  
30

31  Other (where?) (5) \_\_\_\_\_  
32  
33

34  
35  
36 -----  
37  
38  
39 Q12 Have you had direct contact (i.e. diagnosed, treated or provided care) with COVID-19  
40 infected patients?  
41

42  Yes (1)  
43

44  No (2)  
45  
46  
47 -----  
48



50  
51 Q10 How many years are you working in the healthcare system, since graduation?  
52  
53  
54 \_\_\_\_\_  
55  
56  
57  
58  
59  
60

1  
2  
3  
4  
5  
6  
7  
8  
9  
10  
11  
12  
13  
14  
15  
16  
17  
18  
19  
20  
21  
22  
23  
24  
25  
26  
27  
28  
29  
30  
31  
32  
33  
34  
35  
36  
37  
38  
39  
40  
41  
42  
43  
44  
45  
46  
47  
48  
49  
50  
51  
52  
53  
54  
55  
56  
57  
58  
59  
60

---

Q13 Do you belong to a risk population? (i.e. Over the Age of 65 years, High blood pressure, Diabetes, Cardiovascular disease, Chronic respiratory diseases, Conditions and therapies that weaken the immune system, Cancer)

Yes (1)

No (2)

End of Block: Block 3

---

Start of Block: Block 4

Q8 Do you share your household with other people?

Yes (1)

No (2)

Q4 Are you in a relationship?

Yes (1)

No (2)

Q5 Do you have children?

Yes (1)

No (2)

1  
2  
3 Q15 Are you pregnant or are you living together with a pregnant woman?  
4  
5

6  Yes (1)  
7

8  No (2)  
9  
10  
11 -----  
12

13 Q14 Do you have close contact in private to people of the risk population mentioned above?  
14  
15

16  Yes (1)  
17

18  No (2)  
19  
20

21 **End of Block: Block 4**  
22

23 **Start of Block: Block 14**  
24  
25

26 Q33 Are you infected with COVID-19?  
27  
28

29  Yes (1)  
30

31  No (2)  
32

33  Don't know (4)  
34  
35  
36 -----  
37  
38

39 Q34 Have you been positively tested for COVID-19 antibodies?  
40  
41

42  Yes (1)  
43

44  No (2)  
45  
46

47 **End of Block: Block 14**  
48

49 **Start of Block: Block 5**  
50  
51  
52  
53  
54  
55  
56  
57  
58  
59  
60

Q17 Below is a list of statement about concerns with respect to COVID-19 (SFI Questionnaire). Please indicate how much you agree with each statement.

|                                                                                                            | very little (1)       | (2)                   | (3)                   | (4)                   | very much (5)         |
|------------------------------------------------------------------------------------------------------------|-----------------------|-----------------------|-----------------------|-----------------------|-----------------------|
| To what extent are you concerned about COVID-19? (1)                                                       | <input type="radio"/> |
| To what extent do you believe that COVID-19 could become a "pandemic" in you current resident country? (2) | <input type="radio"/> |
| How likely is it that you could become infected with COVID-19? (3)                                         | <input type="radio"/> |
| How likely is it that someone you know could become infected with COVID-19? (4)                            | <input type="radio"/> |
| How quickly do you believe contamination from COVID-19 is spreading in your current resident country? (5)  | <input type="radio"/> |
| How much exposure have you had                                                                             | <input type="radio"/> |

For peer review only

1  
2  
3 to information  
4 about  
5 COVID-19?  
6 (6)  
7

8 If you did  
9 become  
10 infected with  
11 COVID-19, to  
12 what extent  
13 are you  
14 concerned  
15 that you will  
16 be severely ill?  
17 (7)  
18

19 To what  
20 extend has  
21 the threat of  
22 COVID-19  
23 influenced  
24 your  
25 decisions to  
26 be around  
27 people? (8)  
28

29 To what  
30 extend has  
31 the threat of  
32 COVID-19  
33 influenced  
34 your travel  
35 plans? (9)  
36

37 To what  
38 extend has  
39 the threat of  
40 COVID-19  
41 influenced  
42 your use of  
43 safety  
44 behaviors (  
45 e.g. hand  
46 sanitizer)?  
47 (10)  
48  
49  
50  
51  
52

For peer review only

|                       |                       |                       |                       |                       |
|-----------------------|-----------------------|-----------------------|-----------------------|-----------------------|
| <input type="radio"/> |
| <input type="radio"/> |
| <input type="radio"/> |
| <input type="radio"/> |

53 End of Block: Block 5

54  
55 Start of Block: Block 6  
56  
57  
58  
59  
60

Q21 Over **the last 2 weeks**, how often have you been bothered by any of the following problems?  
(PHQ-9 Questionnaire)

|                                                                                                                                                      | Not at all (1)        | Several days (2)      | More than half the days (3) | Nearly every day (4)  |
|------------------------------------------------------------------------------------------------------------------------------------------------------|-----------------------|-----------------------|-----------------------------|-----------------------|
| Little interest or pleasure in doing things (1)                                                                                                      | <input type="radio"/> | <input type="radio"/> | <input type="radio"/>       | <input type="radio"/> |
| Feeling down, depressed, or hopeless (2)                                                                                                             | <input type="radio"/> | <input type="radio"/> | <input type="radio"/>       | <input type="radio"/> |
| Trouble falling or staying asleep, or sleeping too much (3)                                                                                          | <input type="radio"/> | <input type="radio"/> | <input type="radio"/>       | <input type="radio"/> |
| Feeling tired or having little energy (4)                                                                                                            | <input type="radio"/> | <input type="radio"/> | <input type="radio"/>       | <input type="radio"/> |
| Poor appetite or overeating (5)                                                                                                                      | <input type="radio"/> | <input type="radio"/> | <input type="radio"/>       | <input type="radio"/> |
| Feeling bad about yourself - or that you are a failure or have let yourself or your family down (6)                                                  | <input type="radio"/> | <input type="radio"/> | <input type="radio"/>       | <input type="radio"/> |
| Trouble concentrating on things, such as reading the newspaper or watching television (7)                                                            | <input type="radio"/> | <input type="radio"/> | <input type="radio"/>       | <input type="radio"/> |
| Moving or speaking so slowly that other people could have noticed? Or the opposite - being so fidgety or restless that you have been moving around a | <input type="radio"/> | <input type="radio"/> | <input type="radio"/>       | <input type="radio"/> |

For peer review only

1  
2  
3  
4  
5  
6  
7  
8  
9  
10  
11  
12  
13  
14  
15  
16  
17  
18  
19  
20  
21  
22  
23  
24  
25  
26  
27  
28  
29  
30  
31  
32  
33  
34  
35  
36  
37  
38  
39  
40  
41  
42  
43  
44  
45  
46  
47  
48  
49  
50  
51  
52  
53  
54  
55  
56  
57  
58  
59  
60

lot more than usual (8)  
Thoughts that you would be better off dead or of hurting yourself in some way (9)

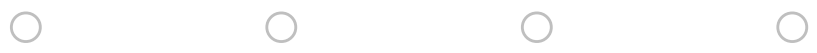

End of Block: Block 6

Start of Block: Block 7

Q24 .

0 (Not at all) 10 (Extremely)

I am afraid I will become infected with COVID-19 while on the job. ()

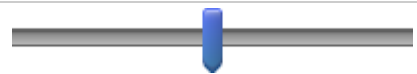

Q25 .

0 (Not at all) 10 (Extremely)

How stressful is your current work situation for you? ()

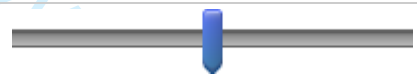

End of Block: Block 7

Start of Block: Block 8

Q19

Please read each statement below, and indicate how distressing each difficulty has been for you during the **past 7 days** with respect to **your current work situation**. How much have you been distressed or bothered by these difficulties? (IES-6-questionnaire)

|                                                                                           | Not at all (1)        | A little bit (2)      | Moderately (3)        | Quite a bit (4)       | Extremely (5)         |
|-------------------------------------------------------------------------------------------|-----------------------|-----------------------|-----------------------|-----------------------|-----------------------|
| I thought about it when I didn't mean to. (1)                                             | <input type="radio"/> |
| I felt watchful or on-guard. (2)                                                          | <input type="radio"/> |
| Other things kept making me think about it. (3)                                           | <input type="radio"/> |
| I was aware that I still had a lot of feelings about it, but I didn't deal with them. (4) | <input type="radio"/> |
| I tried not to think about it. (5)                                                        | <input type="radio"/> |
| I had trouble concentrating. (6)                                                          | <input type="radio"/> |

For peer review only

End of Block: Block 8

Start of Block: Block 9



1  
2  
3  
4  
5  
6  
7  
8  
9  
10  
11  
12  
13  
14  
15  
16  
17  
18  
19  
20  
21  
22  
23  
24  
25  
26  
27  
28  
29  
30  
31  
32  
33  
34  
35  
36  
37  
38  
39  
40  
41  
42  
43  
44  
45  
46  
47  
48  
49  
50  
51  
52  
53  
54  
55  
56  
57  
58  
59  
60

Q25 How do you personally find your current job and work situation in general?

|                   | 1 (1)                 | 2 (2)                 | 3 (3)                 | 4 (4)                 | 5 (5)                 | 6 (6)                 | 7 (7)                 |                         |
|-------------------|-----------------------|-----------------------|-----------------------|-----------------------|-----------------------|-----------------------|-----------------------|-------------------------|
| manageable        | <input type="radio"/> | unmanageable            |
| meaningless       | <input type="radio"/> | meaningful              |
| structured        | <input type="radio"/> | unstructured            |
| easy to influence | <input type="radio"/> | impossible to influence |
| insignificant     | <input type="radio"/> | significant             |
| clear             | <input type="radio"/> | unclear                 |
| controllable      | <input type="radio"/> | uncontrollable          |
| unrewarding       | <input type="radio"/> | rewarding               |
| predictable       | <input type="radio"/> | unpredictable           |

End of Block: Block 9

Start of Block: Block 10

Q22

For each statement below, please make one selection that best indicates how much you agree with the following statements as they apply to you over the **last 4 weeks**. (CD-RISC Questionnaire)

If a particular situation has not occurred recently, answer according to how you think you would have felt.

|                                                                             | not true at all<br>(1) | rarely true (2)       | sometimes<br>true (3) | often true (4)        | true nearly all<br>of the time (5) |
|-----------------------------------------------------------------------------|------------------------|-----------------------|-----------------------|-----------------------|------------------------------------|
| I am able to adapt when changes occur. (1)                                  | <input type="radio"/>  | <input type="radio"/> | <input type="radio"/> | <input type="radio"/> | <input type="radio"/>              |
| I can deal with whatever comes my way. (2)                                  | <input type="radio"/>  | <input type="radio"/> | <input type="radio"/> | <input type="radio"/> | <input type="radio"/>              |
| I try to see the humorous side of things when I am faced with problems. (3) | <input type="radio"/>  | <input type="radio"/> | <input type="radio"/> | <input type="radio"/> | <input type="radio"/>              |
| Having to cope with stress can make me stronger. (4)                        | <input type="radio"/>  | <input type="radio"/> | <input type="radio"/> | <input type="radio"/> | <input type="radio"/>              |
| I tend to bounce back after illness, injury, or other hardships. (5)        | <input type="radio"/>  | <input type="radio"/> | <input type="radio"/> | <input type="radio"/> | <input type="radio"/>              |
| I believe I can achieve my goals, even if there are obstacles. (6)          | <input type="radio"/>  | <input type="radio"/> | <input type="radio"/> | <input type="radio"/> | <input type="radio"/>              |
| Under pressure, I stay focused and think clearly. (7)                       | <input type="radio"/>  | <input type="radio"/> | <input type="radio"/> | <input type="radio"/> | <input type="radio"/>              |

1  
2  
3  
4  
5  
6  
7  
8  
9  
10  
11  
12  
13  
14  
15  
16  
17  
18  
19  
20  
21  
22  
23  
24  
25  
26  
27  
28  
29  
30  
31  
32  
33  
34  
35  
36  
37  
38  
39  
40  
41  
42  
43  
44  
45  
46  
47  
48  
49  
50  
51  
52  
53  
54  
55  
56  
57  
58  
59  
60

I am not easily discouraged by failure. (8)

I think of myself as a strong person when dealing with life's challenges and difficulties (9)

I am able to handle unpleasant or painful feelings like sadness, fear, and anger. (10)

End of Block: Block 10

Start of Block: Default Question Block

For peer review only

Q16 Finally, please indicate how much you agree at present with each statement. (PVD Questionnaire)

|                                                                                       | strongly disagree (1) | (2)                   | (3)                   | (4)                   | (5)                   | (6)                   | strongly agree (7)    |
|---------------------------------------------------------------------------------------|-----------------------|-----------------------|-----------------------|-----------------------|-----------------------|-----------------------|-----------------------|
| In general, I am very susceptible to colds, flu and other infectious diseases. (1)    | <input type="radio"/> |
| I am unlikely to catch a cold, flu or other illness, even if it's "going around". (2) | <input type="radio"/> |
| If an illness is "going around", i will get it. (3)                                   | <input type="radio"/> |
| My immune system protects me from most illnesses that other people get. (4)           | <input type="radio"/> |
| I am more likely than the people around me to catch an infectious disease. (5)        | <input type="radio"/> |
| My past experiences make me believe I am not likely to get sick even when             | <input type="radio"/> |

1  
2  
3 my friends  
4 are sick. (6)  
5

6 I have a  
7 history of  
8 susceptibility  
9 to infectious  
10 disease. (7)  
11

12 I prefer to  
13 wash my  
14 hands pretty  
15 soon after  
16 shaking  
17 someone's  
18 hand. (8)  
19

20 I avoid using  
21 public  
22 telephones  
23 because of  
24 the risk that i  
25 may catch  
26 something  
27 from the  
28 previous  
29 user. (9)  
30

31 I do not like  
32 to write with  
33 a pencil  
34 someone  
35 else has  
36 obviously  
37 chewed on.  
38 (10)  
39

40 I dislike  
41 wearing  
42 used clothes  
43 because you  
44 do not know  
45 what the last  
46 person who  
47 wore it was  
48 like. (11)  
49

50 I am  
51 comfortable  
52 sharing a  
53 water bottle  
54 with a friend.  
55  
56  
57  
58  
59  
60

|                       |                       |                       |                       |                       |                       |                       |
|-----------------------|-----------------------|-----------------------|-----------------------|-----------------------|-----------------------|-----------------------|
| <input type="radio"/> |
| <input type="radio"/> |
| <input type="radio"/> |
| <input type="radio"/> |
| <input type="radio"/> |
| <input type="radio"/> |
| <input type="radio"/> |

For peer review only

1  
2  
3  
4  
5  
6  
7  
8  
9  
10  
11  
12  
13  
14  
15  
16  
17  
18  
19  
20  
21  
22  
23  
24  
25  
26  
27  
28  
29  
30  
31  
32  
33  
34  
35  
36  
37  
38  
39  
40  
41  
42  
43  
44  
45  
46  
47  
48  
49  
50  
51  
52  
53  
54  
55  
56  
57  
58  
59  
60

(12)  
It really bothers me when people sneeze without covering their mouths. (13)

It does not make me anxious to be around sick people. (14)

My hands do not feel dirty after touching money. (15)

End of Block: Default Question Block

---

Start of Block: Block 11

Q32 Do you have any comments or suggestions?

\_\_\_\_\_  
\_\_\_\_\_  
\_\_\_\_\_  
\_\_\_\_\_  
\_\_\_\_\_

End of Block: Block 11

---

1  
2  
3 Last page:  
4

5 You have now completed the full questionnaire – Thank you!  
6

7  
8 Your contribution in this study is of utmost importance to gain insight on healthcare  
9 providers' resilience in the present time.  
10

11 We will ask you to fill in another shorter questionnaire in summer and in autumn.  
12

13 Kind regards,  
14

15  
16 Prof. Dr. Robert Greif, MME, FERC  
17 [robert.greif@insel.ch](mailto:robert.greif@insel.ch)

18  
19 Dr. phil. Sandra Abegglen  
20 [sandra.abegglen@psy.unibe.ch](mailto:sandra.abegglen@psy.unibe.ch)  
21  
22  
23  
24  
25  
26  
27  
28  
29  
30  
31  
32  
33  
34  
35  
36  
37  
38  
39  
40  
41  
42  
43  
44  
45  
46  
47  
48  
49  
50  
51  
52  
53  
54  
55  
56  
57  
58  
59  
60

## Interview Guide for Semi-Structured Interviews: Distress and Resilience of Healthcare Professionals during the COVID-19-Pandemic (DARVID)

### **Before we begin:**

1. Extend your greetings, and thank all of the participants for being there and for their participation. Remind them that the interview will be video and audio recorded, and then viewed by the investigating team, for coding and transcription purposes. Tell them that you guarantee that all information will remain anonymous.
2. Ask for their written voluntary consent to participate in the interview.
3. Explain that, first and foremost, our interest in the focus group is to evaluate the ideas of the participants and their contributions.
4. Set the ground rules for group discussion (i.e., role of facilitators, role of the assistant, audio and video recording, raising hands, do not speak at the same time).
5. **Start the video and audio-recording devices**

### **Introduction (5 minutes)**

1. Explanation that the focus group will be divided into different sections.
2. Short presentation round.
3. Experience and background of participants:
  - Age (Make a note on sex)
  - Profession/ in the front line?
  - Previous work experience
4. Were you working in your usual workplace during the pandemic? If not, where?
5. Ask about the experience of filling in the questionnaire, and what the participants thought was the purpose of it.



**Survey (45 minutes)**

1. *Explain briefly the purpose of the study (association of resilience and a work-related sense of coherence with development of mental health symptoms).*

**Stress / Personal circumstances**

2. What was the most relevant stress factor related to work and to private life during the pandemic?

**Perceived vulnerability**

3. Were you especially afraid of being contaminated? When?
4. What did you do to manage your worries about contamination?

**Traumatic stress**

5. How was your sleeping quality and quantity during the special situation of the COVID-19 pandemic compared to before the pandemic arrived?
  - a. Did you have nightmares during the COVID-19 pandemic, or do you at present?
  - b. Did you have difficulties falling asleep during the COVID-19 pandemic, or do you at present?
  - c. Did you have difficulties staying asleep for several hours?
6. If you remember your working situation during the COVID-19 pandemic: Were you exposed to a very stressful event that was life-threatening for you or another person, which was frightening or distressing for you during the COVID-19 pandemic? (If you feel ok to describe this event a little bit more, please do it)
  - a. What do you do if distressing and intense memories come up?
  - b. Do you experience physical reactions or severe distress when you are reminded or relating to this event / or your working situation during the COVID-19 pandemic?  
(Which?)

c. What do you do if physical reactions or severe distress come up?

7. Did you notice any difference in your emotional state during the COVID-19 pandemic (i.e. feeling more aggressive, feeling numb, being hypervigilant, feeling guilty)?

### Depression

8. The following questions will focus on your state of depression related to your working situation during the COVID-19 pandemic

a. Have you felt depressed? In which situation?

b. What have you done to feel more comfortable?

9. Did you experience appetite disorders (poor appetite/ overeating), panic attacks, worry all the time, etc?

### Resilience

10. What do you think resilience is?

a. Did you feel especially resilient during the pandemic?

b. What was the most important individual factor and social factor that improved your resilience during the pandemic?

c. What would be helpful for you to enhance your resilience at work in the future?

d. What can your organisation do to enhance your resilience at work in the future?

### Work-related sense of coherence

11. When you think about your working situation during the COVID-19 pandemic, what was different during the pandemic?

12. What was it like to provide care for COVID-19 patients?

13. How do you feel your hospital performed during the pandemic?

**Final remarks (5 minutes)**

1. If you advise your past self (six months ago) on how to react to the Corona pandemic, what would your main advice be?

2. Thank you (distribution of an incentive voucher?)

**3. Stop video and audio-recording devices**

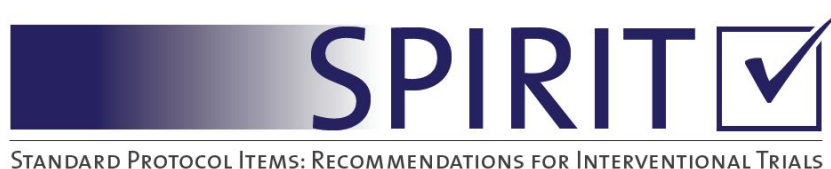

STANDARD PROTOCOL ITEMS: RECOMMENDATIONS FOR INTERVENTIONAL TRIALS

SPIRIT 2013 Checklist: Recommended items to address in a clinical trial protocol and related documents\*

| Section/item                      | Item No | Description                                                                                                                                                                                                                                                                                                    |
|-----------------------------------|---------|----------------------------------------------------------------------------------------------------------------------------------------------------------------------------------------------------------------------------------------------------------------------------------------------------------------|
| <b>Administrative information</b> |         |                                                                                                                                                                                                                                                                                                                |
| Title                             | 1       | Descriptive title identifying the study design, population, interventions, and, if applicable, trial acronym → <a href="#">page 1</a>                                                                                                                                                                          |
| Trial registration                | 2a      | Trial identifier and registry name. If not yet registered, name of intended registry → <a href="#">page 2</a>                                                                                                                                                                                                  |
|                                   | 2b      | All items from the World Health Organization Trial Registration Data Set → <a href="#">n/a</a>                                                                                                                                                                                                                 |
| Protocol version                  | 3       | Date and version identifier → <a href="#">page 1</a>                                                                                                                                                                                                                                                           |
| Funding                           | 4       | Sources and types of financial, material, and other support → <a href="#">page 19</a>                                                                                                                                                                                                                          |
| Roles and responsibilities        | 5a      | Names, affiliations, and roles of protocol contributors → <a href="#">page 1</a>                                                                                                                                                                                                                               |
|                                   | 5b      | Name and contact information for the trial sponsor → <a href="#">n/a</a>                                                                                                                                                                                                                                       |
|                                   | 5c      | Role of study sponsor and funders, if any, in study design; collection, management, analysis, and interpretation of data; writing of the report; and the decision to submit the report for publication, including whether they will have ultimate authority over any of these activities → <a href="#">n/a</a> |
|                                   | 5d      | Composition, roles, and responsibilities of the coordinating centre, steering committee, endpoint adjudication committee, data management team, and other individuals or groups overseeing the trial, if applicable (see Item 21a for data monitoring committee) → <a href="#">n/a</a>                         |
| <b>Introduction</b>               |         |                                                                                                                                                                                                                                                                                                                |
| Background and rationale          | 6a      | Description of research question and justification for undertaking the trial, including summary of relevant studies (published and unpublished) examining benefits and harms for each intervention → <a href="#">page 4-6</a>                                                                                  |
|                                   | 6b      | Explanation for choice of comparators → <a href="#">n/a</a>                                                                                                                                                                                                                                                    |
| Objectives                        | 7       | Specific objectives or hypotheses → <a href="#">page 4-6</a>                                                                                                                                                                                                                                                   |

1  
2 Trial design 8 Description of trial design including type of trial (eg, parallel group,  
3 crossover, factorial, single group), allocation ratio, and framework (eg,  
4 superiority, equivalence, noninferiority, exploratory) → [page 6](#)  
5  
6  
7

8 **Methods: Participants, interventions, and outcomes**  
9

10 Study setting 9 Description of study settings (eg, community clinic, academic hospital)  
11 and list of countries where data will be collected. Reference to where  
12 list of study sites can be obtained → [page 6-7,10](#)  
13

14 Eligibility criteria 10 Inclusion and exclusion criteria for participants. If applicable, eligibility  
15 criteria for study centres and individuals who will perform the  
16 interventions (eg, surgeons, psychotherapists) → [page 7-8](#)  
17  
18

19 Interventions 11a Interventions for each group with sufficient detail to allow replication,  
20 including how and when they will be administered → **n/a**  
21 **(observational study)**  
22

23 11b Criteria for discontinuing or modifying allocated interventions for a  
24 given trial participant (eg, drug dose change in response to harms,  
25 participant request, or improving/worsening disease) → **n/a**  
26 **(observational study)**  
27  
28

29 11c Strategies to improve adherence to intervention protocols, and any  
30 procedures for monitoring adherence (eg, drug tablet return,  
31 laboratory tests) → **n/a (observational study)**  
32  
33

34 11d Relevant concomitant care and interventions that are permitted or  
35 prohibited during the trial → **n/a (observational study)**  
36

37 Outcomes 12 Primary, secondary, and other outcomes, including the specific  
38 measurement variable (eg, systolic blood pressure), analysis metric  
39 (eg, change from baseline, final value, time to event), method of  
40 aggregation (eg, median, proportion), and time point for each  
41 outcome. Explanation of the clinical relevance of chosen efficacy and  
42 harm outcomes is strongly recommended → [page 8-10 \(quantitative  
43 phase\) & 10-11 \(qualitative phase\)](#)  
44  
45

46 Participant 13 Time schedule of enrolment, interventions (including any run-ins and  
47 timeline washouts), assessments, and visits for participants. A schematic  
48 diagram is highly recommended (see Figure) → [page 19, Figure 1](#)  
49

50 Sample size 14 Estimated number of participants needed to achieve study objectives  
51 and how it was determined, including clinical and statistical  
52 assumptions supporting any sample size calculations → [page 9](#)  
53 [\(quantitative phase\) & page 10 \(qualitative phase\)](#)  
54  
55

56 Recruitment 15 Strategies for achieving adequate participant enrolment to reach  
57 target sample size → [page 7](#)  
58  
59

60 **Methods: Assignment of interventions (for controlled trials) → n/a (observational study)**

## Allocation:

|                                  |     |                                                                                                                                                                                                                                                                                                                                                                                             |
|----------------------------------|-----|---------------------------------------------------------------------------------------------------------------------------------------------------------------------------------------------------------------------------------------------------------------------------------------------------------------------------------------------------------------------------------------------|
| Sequence generation              | 16a | Method of generating the allocation sequence (eg, computer-generated random numbers), and list of any factors for stratification. To reduce predictability of a random sequence, details of any planned restriction (eg, blocking) should be provided in a separate document that is unavailable to those who enrol participants or assign interventions → <b>n/a (observational study)</b> |
| Allocation concealment mechanism | 16b | Mechanism of implementing the allocation sequence (eg, central telephone; sequentially numbered, opaque, sealed envelopes), describing any steps to conceal the sequence until interventions are assigned → <b>n/a (observational study)</b>                                                                                                                                                |
| Implementation                   | 16c | Who will generate the allocation sequence, who will enrol participants, and who will assign participants to interventions → <b>n/a (observational study)</b>                                                                                                                                                                                                                                |
| Blinding (masking)               | 17a | Who will be blinded after assignment to interventions (eg, trial participants, care providers, outcome assessors, data analysts), and how → <b>n/a (observational study)</b>                                                                                                                                                                                                                |
|                                  | 17b | If blinded, circumstances under which unblinding is permissible, and procedure for revealing a participant's allocated intervention during the trial → <b>n/a (observational study)</b>                                                                                                                                                                                                     |

**Methods: Data collection, management, and analysis**

|                         |     |                                                                                                                                                                                                                                                                                                                                                                                                                                                                                          |
|-------------------------|-----|------------------------------------------------------------------------------------------------------------------------------------------------------------------------------------------------------------------------------------------------------------------------------------------------------------------------------------------------------------------------------------------------------------------------------------------------------------------------------------------|
| Data collection methods | 18a | Plans for assessment and collection of outcome, baseline, and other trial data, including any related processes to promote data quality (eg, duplicate measurements, training of assessors) and a description of study instruments (eg, questionnaires, laboratory tests) along with their reliability and validity, if known. Reference to where data collection forms can be found, if not in the protocol → <b>page 7-9 (quantitative phase) &amp; page 10-11 (qualitative phase)</b> |
|                         | 18b | Plans to promote participant retention and complete follow-up, including list of any outcome data to be collected for participants who discontinue or deviate from intervention protocols → <b>n/a</b>                                                                                                                                                                                                                                                                                   |
| Data management         | 19  | Plans for data entry, coding, security, and storage, including any related processes to promote data quality (eg, double data entry; range checks for data values). Reference to where details of data management procedures can be found, if not in the protocol → <b>page 12</b>                                                                                                                                                                                                       |
| Statistical methods     | 20a | Statistical methods for analysing primary and secondary outcomes. Reference to where other details of the statistical analysis plan can be found, if not in the protocol → <b>page 8-9 (quantitative phase) &amp; page 11 (qualitative phase)</b>                                                                                                                                                                                                                                        |

- 1  
2 20b Methods for any additional analyses (eg, subgroup and adjusted  
3 analyses) → **n/a**  
4  
5 20c Definition of analysis population relating to protocol non-adherence  
6 (eg, as randomised analysis), and any statistical methods to handle  
7 missing data (eg, multiple imputation) → **n/a**  
8

### 9 **Methods: Monitoring**

- 10  
11 Data monitoring 21a Composition of data monitoring committee (DMC); summary of its role  
12 and reporting structure; statement of whether it is independent from  
13 the sponsor and competing interests; and reference to where further  
14 details about its charter can be found, if not in the protocol.  
15 Alternatively, an explanation of why a DMC is not needed → **page 12**  
16  
17  
18 21b Description of any interim analyses and stopping guidelines, including  
19 who will have access to these interim results and make the final  
20 decision to terminate the trial → **n/a**  
21  
22  
23 Harms 22 Plans for collecting, assessing, reporting, and managing solicited and  
24 spontaneously reported adverse events and other unintended effects  
25 of trial interventions or trial conduct → **n/a**  
26  
27 Auditing 23 Frequency and procedures for auditing trial conduct, if any, and  
28 whether the process will be independent from investigators and the  
29 sponsor → **n/a**  
30  
31

### 32 **Ethics and dissemination**

- 33  
34 Research ethics 24 Plans for seeking research ethics committee/institutional review board  
35 approval → **page 11-12**  
36  
37 Protocol 25 Plans for communicating important protocol modifications (eg,  
38 amendments changes to eligibility criteria, outcomes, analyses) to relevant parties  
39 (eg, investigators, REC/IRBs, trial participants, trial registries, journals,  
40 regulators) → **n/a**  
41  
42  
43 Consent or assent 26a Who will obtain informed consent or assent from potential trial  
44 participants or authorised surrogates, and how (see Item 32) → **page**  
45 **11-12**  
46  
47 26b Additional consent provisions for collection and use of participant data  
48 and biological specimens in ancillary studies, if applicable → **n/a**  
49  
50 Confidentiality 27 How personal information about potential and enrolled participants will  
51 be collected, shared, and maintained in order to protect confidentiality  
52 before, during, and after the trial → **page 11-12**  
53  
54  
55 Declaration of 28 Financial and other competing interests for principal investigators for  
56 interests the overall trial and each study site → **page 19**  
57  
58  
59  
60

|    |                               |     |                                                                                                                                                                                                                                                                                                                  |
|----|-------------------------------|-----|------------------------------------------------------------------------------------------------------------------------------------------------------------------------------------------------------------------------------------------------------------------------------------------------------------------|
| 1  |                               |     |                                                                                                                                                                                                                                                                                                                  |
| 2  | Access to data                | 29  | Statement of who will have access to the final trial dataset, and disclosure of contractual agreements that limit such access for investigators → <a href="#">page 11-12</a>                                                                                                                                     |
| 3  |                               |     |                                                                                                                                                                                                                                                                                                                  |
| 4  |                               |     |                                                                                                                                                                                                                                                                                                                  |
| 5  |                               |     |                                                                                                                                                                                                                                                                                                                  |
| 6  | Ancillary and post-trial care | 30  | Provisions, if any, for ancillary and post-trial care, and for compensation to those who suffer harm from trial participation → <a href="#">n/a</a>                                                                                                                                                              |
| 7  |                               |     |                                                                                                                                                                                                                                                                                                                  |
| 8  |                               |     |                                                                                                                                                                                                                                                                                                                  |
| 9  | Dissemination policy          | 31a | Plans for investigators and sponsor to communicate trial results to participants, healthcare professionals, the public, and other relevant groups (eg, via publication, reporting in results databases, or other data sharing arrangements), including any publication restrictions → <a href="#">page 12-13</a> |
| 10 |                               |     |                                                                                                                                                                                                                                                                                                                  |
| 11 |                               |     |                                                                                                                                                                                                                                                                                                                  |
| 12 |                               |     |                                                                                                                                                                                                                                                                                                                  |
| 13 |                               |     |                                                                                                                                                                                                                                                                                                                  |
| 14 |                               |     |                                                                                                                                                                                                                                                                                                                  |
| 15 |                               |     |                                                                                                                                                                                                                                                                                                                  |
| 16 |                               | 31b | Authorship eligibility guidelines and any intended use of professional writers → <a href="#">page 19</a>                                                                                                                                                                                                         |
| 17 |                               |     |                                                                                                                                                                                                                                                                                                                  |
| 18 |                               |     |                                                                                                                                                                                                                                                                                                                  |
| 19 |                               |     |                                                                                                                                                                                                                                                                                                                  |
| 20 |                               | 31c | Plans, if any, for granting public access to the full protocol, participant-level dataset, and statistical code → <a href="#">page 11-12</a>                                                                                                                                                                     |
| 21 |                               |     |                                                                                                                                                                                                                                                                                                                  |
| 22 |                               |     |                                                                                                                                                                                                                                                                                                                  |
| 23 | <b>Appendices</b>             |     |                                                                                                                                                                                                                                                                                                                  |
| 24 |                               |     |                                                                                                                                                                                                                                                                                                                  |
| 25 | Informed consent materials    | 32  | Model consent form and other related documentation given to participants and authorised surrogates → <a href="#">page 11-12 &amp; SDC1, page 1</a>                                                                                                                                                               |
| 26 |                               |     |                                                                                                                                                                                                                                                                                                                  |
| 27 |                               |     |                                                                                                                                                                                                                                                                                                                  |
| 28 |                               |     |                                                                                                                                                                                                                                                                                                                  |
| 29 | Biological specimens          | 33  | Plans for collection, laboratory evaluation, and storage of biological specimens for genetic or molecular analysis in the current trial and for future use in ancillary studies, if applicable → <a href="#">n/a</a>                                                                                             |
| 30 |                               |     |                                                                                                                                                                                                                                                                                                                  |
| 31 |                               |     |                                                                                                                                                                                                                                                                                                                  |
| 32 |                               |     |                                                                                                                                                                                                                                                                                                                  |
| 33 |                               |     |                                                                                                                                                                                                                                                                                                                  |

---

\*It is strongly recommended that this checklist be read in conjunction with the SPIRIT 2013 Explanation & Elaboration for important clarification on the items. Amendments to the protocol should be tracked and dated. The SPIRIT checklist is copyrighted by the SPIRIT Group under the Creative Commons "[Attribution-NonCommercial-NoDerivs 3.0 Unported](#)" license.
